# Supplementary material
Source: PubMed Central journal article supplement (PMC8201877)
Supplement: pnas.2019863118.sapp.pdf [file pnas.2019863118.sapp.pdf]

## Supplemental Information Appendix

### Biosynthesis of Fosfomycin in Pseudomonads Reveals a New Enzymatic Activity in the Metallohydrolase Superfamily

Max A. Simon<sup>1</sup>, Chayanid Ongpipattanakul<sup>2</sup>, Satish K. Nair<sup>2,\*</sup> and Wilfred A. van der Donk<sup>1,3\*</sup>

<sup>1</sup>Department of Bioengineering and Carl R. Woese Institute for Genomic Biology, <sup>2</sup>Department of Biochemistry, <sup>3</sup>Department of Chemistry, Howard Hughes Medical Institute, University of Illinois at Urbana-Champaign, Urbana, IL 61801

#### Contents

SI Appendix Materials and Methods

**Figure S1.** Previously proposed biosynthesis of fosfomycin in *Pseudomonas*.

**Figure S2.** <sup>1</sup>H-<sup>31</sup>P HMBC NMR spectrum of *psfABC* expressing *E. coli* cell lysate.

**Figure S3.** <sup>1</sup>H-<sup>13</sup>C HMBC NMR spectrum of *psfABC* expressing *E. coli* cell lysate.

**Figure S4.** <sup>1</sup>H-<sup>13</sup>C gHMBCAD spectrum of 3-OBPn.

**Figure S5.** <sup>1</sup>H-<sup>13</sup>C HSQCAD spectrum of 3-OBPn.

**Figure S6.** <sup>31</sup>P NMR spectra of synthetic 2-OPP and semi-synthetic 3-OBPn standards.

**Figure S7.** <sup>31</sup>P NMR spectra for chemical reduction of lysates of *psfABC* expressing *E. coli* cells.

**Figure S8.** Sequence alignment of selected PsfC-like proteins.

**Figure S9.** Alanine substitution mutants performed on PsfC to assess their impact on catalysis.

**Figure S10.** Activity of PsfC variants when co-expressed with PsfAB in *E. coli* determined by <sup>31</sup>P NMR.

**Figure S11.** <sup>31</sup>P NMR spectrum of *in vitro* assays with PsfC.

**Figure S12.** <sup>1</sup>H NMR spectrum of the upfield region of the products of single-turnover assay of Fe-reconstituted PsfC.

**Figure S13.** Probe of hydrogen-deuterium solvent exchange at C2 and C4 of 3-OBPn.

**Figure S14.** <sup>13</sup>C and <sup>31</sup>P NMR spectra of 3-OBPn produced enzymatically in D<sub>2</sub>O and H<sub>2</sub>O.

**Figure S15.** Phylogenetic analysis of PsfC.

**Figure S16.** Co-expression of PsfC homologs produce same products as fosfomycin pathway.

**Scheme S1.** Alternative mechanism of oxidative decarboxylation of 2-Pmm to form 3-OBPn.

**Table S1.** Fe-Fe distances observed in structures of nonheme diiron enzymes.

**Table S2.** Accession numbers used for phylogenetic analysis of PsfC.

**Table S3.** Oligonucleotides used in this study.

**Table S4.** Plasmids and microorganisms used in this study.

**Table S5.** Data collection and refinement statistics.

## ***SI Appendix Materials and Methods***

All oligonucleotides used in this study were purchased from Integrated DNA Technologies (*SI Appendix Table S3*). Reagents used for molecular biology experiments and Luria-Bertani (LB) medium were purchased from New England BioLabs, Thermo Fisher Scientific, MilliporeSigma, or Gold Biotechnology. Plasmid sequencing was performed by ACGT Inc. and constructs are listed in *SI Appendix Table S4*. *E. coli* DH5 $\alpha$  was used for plasmid maintenance, and *E. coli* BL21(DE3) or Rosetta2 pLysS was used for protein overexpression. Genomic DNA from *P. syringae* PB-5123 was isolated with MoBio UltraClean Microbial DNA Isolation Kit and used for amplification of all genes. gBlocks encoding PsfC homologs were codon-optimized and purchased from Twist Bioscience. Standard molecular biology techniques were employed for cloning of genes using Q5 polymerase. Mutant variants were generated using the QuikChange method with Phusion polymerase.

### **Expression and Purification of RhiH**

The PepM RhiH was purified as described previously (1) for *in vitro* preparation of 2-Pmm.

### **Expression and Purification of PsfB**

*E. coli* (DE3) Rosetta2pLysS cells harboring the PsfB-encoding plasmid were grown in LB medium supplemented with 34  $\mu\text{g}/\text{mL}$  chloramphenicol and 100  $\mu\text{g}/\text{mL}$  ampicillin at 37 °C until OD<sub>600</sub> reached 0.6-0.8. The expression of N-terminally His<sub>6</sub>-tagged PsfB was induced by addition of IPTG to 0.25 mM, and the culture was cooled to 18 °C for 16 h. Cells were harvested via centrifugation, washed once with lysis buffer (50 mM HEPES, pH 8.0, 300 mM NaCl, 10 mM imidazole, 2.5% glycerol), and resuspended in the same buffer on ice. Cells were homogenized by two passes through a French Press at 1,000 psi (Thermo Electron Corporation). Lysates were clarified via centrifugation at 30,600 g for 1 h. Clarified supernatant was applied to 5 mL of HisPur Ni-NTA resin (Thermo Fisher Scientific) pre-equilibrated with lysis buffer and incubated at 4 °C for 15 min with gentle rotation. The resin was washed twice with lysis buffer, followed by a wash buffer containing 30 mM imidazole. Protein was eluted in the same buffer containing 250 mM imidazole and 10% glycerol. Fractions containing protein identified by a NanoDrop spectrophotometer (Thermo Scientific) were pooled and concentrated in Amicon Ultra centrifugal filters with a 10 kDa molecular weight cut off. The concentrated fractions were desalted using a PD-10 desalting column (GE Life Sciences) pre-equilibrated with storage buffer (50 mM HEPES, pH 8.0, 250 mM NaCl, 10% glycerol) into storage conditions. Eluted protein was snap-frozen in liquid nitrogen and stored at -80 °C.

### **Expression and Purification of PsfC**

Although active during *in vivo* experiments, we were unable to express and purify the original ORF for *psfC* without causing precipitation. A closer analysis of the gene sequence identified a second putative start codon, which offered higher alignment scores with similar sequences during our phylogenetic analysis (underlined in *SI Appendix Figure S8*); this second ORF starting at Met14 of the original deposited sequence is referred to here as “PsfC-M2” and was successfully expressed and purified. *E. coli* BL21(DE3) cells harboring the PsfC-M2-encoding plasmid were grown in M9 medium supplemented with the appropriate antibiotic (100  $\mu\text{g}/\text{mL}$  ampicillin, 50  $\mu\text{g}/\text{mL}$  kanamycin, or 34  $\mu\text{g}/\text{mL}$  chloramphenicol), 0.2% glucose, 0.1 mM CaCl<sub>2</sub>, 1 mM MgSO<sub>4</sub>, and 0.125 mM (NH<sub>4</sub>)<sub>2</sub>Fe(SO<sub>4</sub>)<sub>2</sub>·(H<sub>2</sub>O)<sub>6</sub> at 37 °C until OD<sub>600</sub> reached 0.6-0.8. The expression of N-terminally His<sub>6</sub>-tagged PsfC-M2 was induced by addition of IPTG to 0.25 mM and additional (NH<sub>4</sub>)<sub>2</sub>Fe(SO<sub>4</sub>)<sub>2</sub>·(H<sub>2</sub>O)<sub>6</sub> to 0.25 mM. The culture was subsequently cooled to 18 °C and incubated for an additional 16 h. Cells were harvested via centrifugation and washed once with lysis buffer (500 mM NaCl, 50 mM MOPS, pH 7.5, 10 mM imidazole, 10% glycerol). Purifications were conducted both aerobically and anaerobically. Anaerobic purifications and buffer preparation were performed inside a vinyl anaerobic chamber (Coy Laboratory Products, 97% N<sub>2</sub> and 3% H<sub>2</sub>). Cells were resuspended in 20 mL of lysis buffer. Cells were homogenized via sonication (30 s on, 1 min off, 20% amplitude, seven cycles). Clarified supernatant was applied to HisPur resin pre-equilibrated with lysis buffer at 4 °C. The

resin was washed twice with lysis buffer, followed by the same buffer with 30 mM imidazole prior to elution with buffer containing 250 mM imidazole and 10% glycerol. Fractions containing protein were pooled, concentrated, and the buffer was exchanged (300 mM NaCl, 50 mM MOPS, pH 7.5) with a 10 kDa Amicon concentrator via centrifugation. Approximately 6 U of thrombin protease (Sigma-Aldrich) per 100 mg His-PsfC was added to the concentrated protein for overnight cleavage at 16 °C. The cleavage progress was determined to be complete by sodium dodecyl sulfate polyacrylamide gel electrophoresis (SDS-PAGE). PsfC-M2 without His<sub>6</sub>-tag was purified by passage over a *p*-aminobenzamidine agarose resin (Sigma-Aldrich), followed by application to a HisPur column. The flow-through was collected and concentrated (*vide supra*). Following removal of the His-tag, aerobically purified PsfC-M2 was subjected to size exclusion chromatography (300 mM KCl, 20 mM HEPES, pH 7.5) and subsequently concentrated. The buffer of anaerobically purified PsfC-M2 was exchanged using a PD-10 column preequilibrated with storage buffer (300 mM NaCl, 50 mM MOPS, pH = 7.5, 10% glycerol) or the crystallization buffer (300 mM KCl, 20 mM HEPES, pH 7.5), and the protein was subsequently concentrated. The protein was frozen immediately in liquid nitrogen and stored at -80 °C or used immediately for *in vitro* assays and crystallography.

### Semi-synthetic Preparation of 3-OBPn Standard

A solution consisting of enzymatically prepared 2-Pmm or its corresponding isotopologues (*vide supra*) was oxygenated by bubbling O<sub>2</sub> gas through the solution for 30 min. The reaction was initiated by addition of (NH<sub>4</sub>)<sub>2</sub>Fe(SO<sub>4</sub>)<sub>2</sub>·(H<sub>2</sub>O)<sub>6</sub> and ascorbic acid to 250 μM and 10 mM, respectively. The reaction proceeded overnight in an open 1.8 mL Eppendorf tube (2-Pmm final concentration approx. 1 mM, 400 μL total volume) and was quenched by addition of EDTA and D<sub>2</sub>O to 15 mM and 10%, respectively. Samples were subsequently analyzed by NMR as described below.

### NMR Data Processing

Most samples were analyzed on an Agilent NMR instrument operating at 599.70 Hz equipped with a OneNMR Probe for <sup>1</sup>H, <sup>13</sup>C (150.81 Hz), and <sup>31</sup>P (242.77 Hz) measurements. Data were acquired on a spectrometer with gradient/pulse-shaping capabilities and console operating VnmrJ 4.2. Samples were held at 25.0 °C during acquisition. Samples were referenced to internal peaks (<sup>1</sup>H and <sup>13</sup>C), or an external standard of 85% H<sub>3</sub>PO<sub>4</sub> for <sup>31</sup>P. Spectra were processed using MestReNova (Mestrelab Research) version 12.0.3. A total of 1024 acquisitions were averaged for one-dimensional <sup>31</sup>P experiments. For <sup>1</sup>H-<sup>31</sup>P HMBC acquisitions of lysates, 8 scans per T1 increment and 48 increments in the indirect dimension were acquired. <sup>1</sup>H-<sup>13</sup>C HSQCAD spectra were recorded for <sup>13</sup>C-enriched samples with 8 scans per T1 increment and 96 increments in the indirect dimension, while <sup>1</sup>H-<sup>13</sup>C gHMBCAD spectra were recorded with 128 increments in the indirect dimension. For enzyme assays of single-turnover conditions, <sup>1</sup>H-<sup>31</sup>P HMBC acquisitions utilized 16 scans per T1 increment and 48 increments in the indirect dimension. Raw FIDs were imported into MestReNova, processed by reduction of T1 noise, and the projection (sum) of the <sup>1</sup>H dimension was extracted. This extracted projection was phased, baseline corrected and apodized with a line-broadening function (1 Hz exponential with a first-point scaling factor of 0.50). <sup>1</sup>H-dimension doublets corresponding to either 2-Pmm (~1.9 ppm) or 3-OBPn (~2.9 ppm) were integrated for analysis.

A subset of samples (*SI Appendix Figure S14*) were analyzed on a 500 MHz Bruker NMR instrument equipped with a CryoProbe. For 1D <sup>1</sup>H-decoupled <sup>13</sup>C spectra and <sup>31</sup>P spectra without <sup>1</sup>H-decoupling, 4096 acquisitions were obtained.

### Enzymatic Preparation of 2-Pmm

A reaction mixture consisting of 5 mM phosphoenolpyruvate (PEP), 7 mM acetyl-coenzyme A (AcCoA), 1 mM MgCl<sub>2</sub>, 0.1 mM MnCl<sub>2</sub>, 50 mM HEPES pH 7.2, 6 μM RhiH, and 26 μM PsfB, was combined at room temperature and allowed to incubate overnight. *In vitro* 2-Pmm production was more robust using the previously characterized RhiH from the rhizoctin B biosynthetic cluster than with PsfA (1) and thus was used for preparation of 2-Pmm. After 12 h, the mixture was centrifuged through a 3 kDa Amicon centrifugal filter to remove proteins and stored at -20 °C until use. The concentration of 2-Pmm was determined via

$^{31}\text{P}$  NMR spectroscopy by comparison to remaining PEP in the sample; approximately 30% product formation was observed (1.6 mM 2-Pmm). Isotopologues used for characterization of 3-OBPn were similarly prepared from either commercial 2- $^{13}\text{C}$ -PEP, 3- $^{13}\text{C}$ -PEP, or synthetic 2- $^{13}\text{C}$ -AcCoA. 2- $^{13}\text{C}$ -AcCoA was prepared from the corresponding acetic anhydride as described previously (*SI Appendix Figure S4-5*) (2).

### Multiple-Turnover Assays with PsfC

For anaerobic experiments, enzymatically synthesized 2-Pmm solutions were deoxygenated by sparging with  $\text{N}_2$  gas for 30 min and transfer to a vinyl anaerobic chamber (Coy Laboratory Products, 97%  $\text{N}_2$  and 3%  $\text{H}_2$ ) to equilibrate overnight. Anaerobically purified PsfC-M2 (500  $\mu\text{M}$ ) was reconstituted with 2 equiv. of  $(\text{NH}_4)_2\text{Fe}(\text{SO}_4)_2 \cdot (\text{H}_2\text{O})_6$  in 50 mM MOPS pH 7.5 on ice for 30 min. After reconstitution, the assay was initiated by addition of 2-Pmm (1.2 mM final concentration) and ascorbate (10 mM) to a total volume of 400  $\mu\text{L}$ . After 16 h the reaction was quenched by addition of EDTA to 15 mM,  $\text{D}_2\text{O}$  added to 20%, and protein removed using a 10 kDa Amicon centrifugal filter. The flow-through was transferred to an NMR tube, capped, and removed from the anaerobic chamber for NMR analysis (*vide infra*). For aerobic experiments, PsfC-M2 was reconstituted anaerobically as described previously. As a control, an equivalent quantity of bovine serum albumin (BSA) was incubated anaerobically with 2 equiv. of  $(\text{NH}_4)_2\text{Fe}(\text{SO}_4)_2 \cdot (\text{H}_2\text{O})_6$  in 50 mM MOPS pH 7.5 on ice for 30 min. Meanwhile a solution of enzymatically synthesized 2-Pmm (1.6 mM) was aerated via sparging with  $\text{O}_2$  for 1 h. After anaerobic incubation, enzyme was removed from the anaerobic chamber and the reaction initiated by addition of oxygenated 2-Pmm and ascorbate (10 mM). After incubation at room temperature for 16 h, the assay was quenched as described previously and analyzed by NMR spectroscopy.

### Protein Crystallization and Data Collection

Crystals were originally obtained aerobically using sparse matrix screens and PsfC-M2 (i.e. reconstituted with 2 Fe) at a concentration of 15 mg/mL at a 1:1 ratio of condition and protein solution. Initial hits were further optimized using the sitting drop method, at 9 °C (aerobic preparation) and 18 °C (anaerobic preparation). The initial condition that permitted binding only of a single metal contained 0.17-0.20 M sodium malonate, 18-20% PEG 3,350, and bis-tris propane pH 8.5. The precipitant solution that permitted binding of two metals contained 0.17-0.20 M sodium fluoride, and bis-tris propane pH 6.5. Diamond shaped crystals appeared over the course of three days for both conditions. To obtain density for the second metal, crystals were soaked in 10 mM of  $(\text{NH}_4)_2\text{Fe}(\text{SO}_4)_2 \cdot (\text{H}_2\text{O})_6$ . Crystals were soaked in precipitant solution containing 20% glycerol prior to vitrification in liquid nitrogen. Data were collected at the Advanced Photon Source (APS) at Argonne National Laboratory via the Life Science Collaborative Access Team (LS-CAT) at beamlines 21-ID-D and 21-ID-G. Initial diffraction data were processed using autoPROC (3). Experimental phases for PsfC-M2 were obtained by soaking crystals with condition supplemented with 5 mM triethyl lead acetate for 4 h, and were processed using PHASER as contained in the CCP4 suite (4, 5). The resultant experimental map (phasing power = 1.7; mean figure of merit – 0.33) was of excellent quality allowing for automated building of the initial atomic model using wARP (6). The structure was further refined using REFMAC5 (7), and was manually built in COOT (8). The near complete model was then used to carry out refinement against data collected on crystals of Psf13 soaked with  $\text{Fe}^{2+}$  under anaerobic conditions. Anomalous maps were calculated using data collected near the iron absorption edge (1.73 Å).

### Phylogenetic Tree of PHP Domain

A PSI-BLAST search with PsfC as the bait sequence was conducted under standard parameters. The search was stopped after one iteration, as the PsfC sequence was lost in further iterations. The resulting closest neighbors were dereplicated and aligned using MAFFT with G-INS-i parameters, and a simulated maximum-likelihood phylogenetic analysis was performed using FastTree (9, 10). Sequences obtained through PSI-BLAST were also submitted to the program RODEO to determine their local genetic context and assign their context-based function, if any (11).

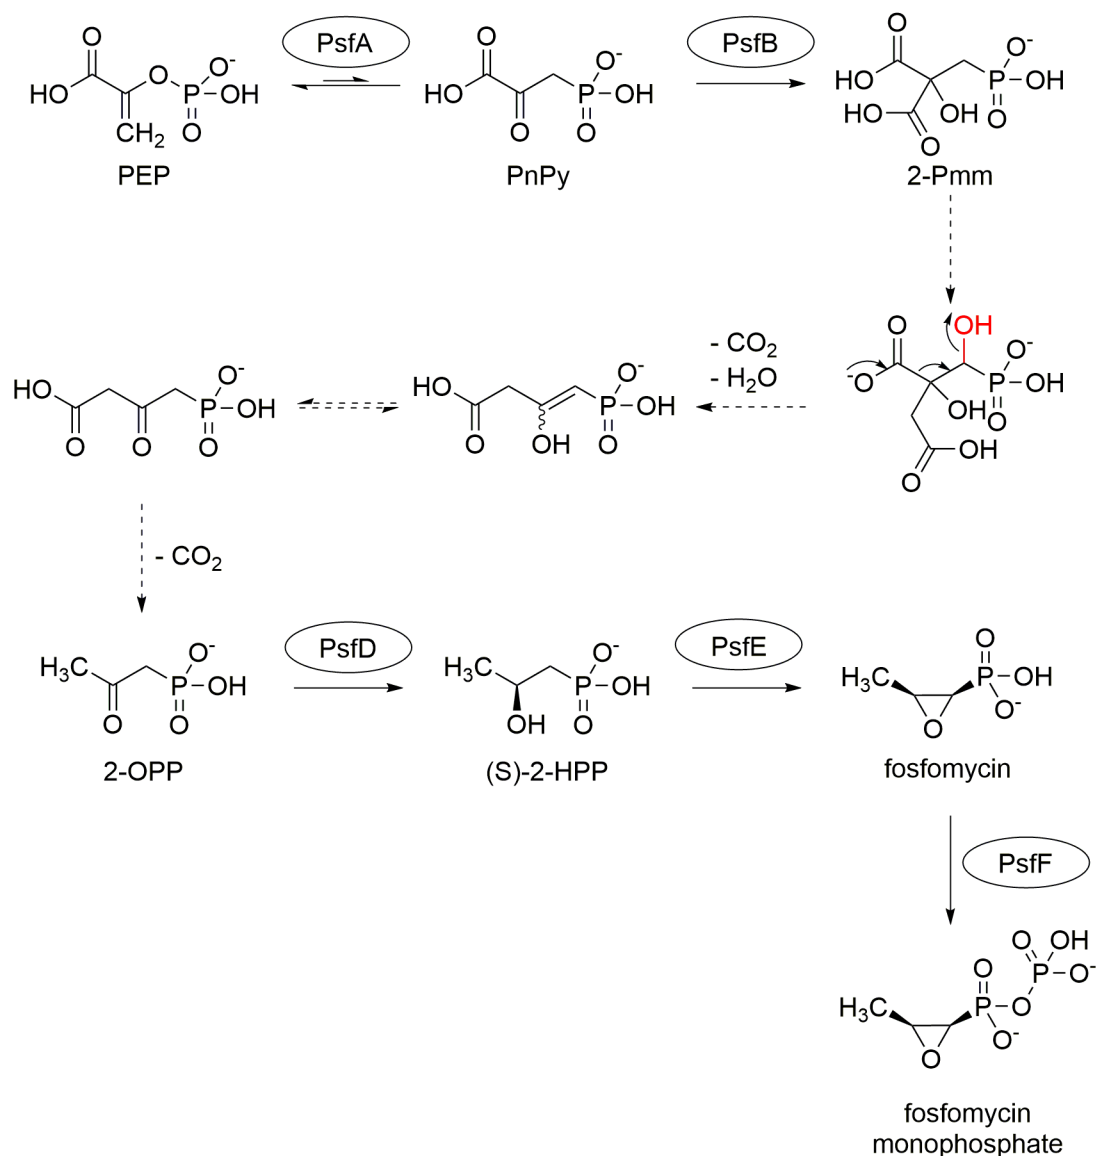

**Figure S1.** Previously proposed biosynthesis of fosfomycin in *Pseudomonas* (12). A) Following chemical logic and common occurrence in phosphonate biosynthetic routes, hydroxylation at C $\alpha$  in 2-Pmm could afford  $\alpha$ -hydroxy-2-Pmm. This intermediate could subsequently eliminate water concomitant with decarboxylation to afford an enolic species. This enol can tautomerize to form the  $\beta$ -keto product, 3-OBPn, which can decarboxylate either spontaneously or enzyme-catalyzed to 2-OPP, a previously characterized on-pathway intermediate. The PsfF reaction is believed to be a resistance mechanism (13-15).

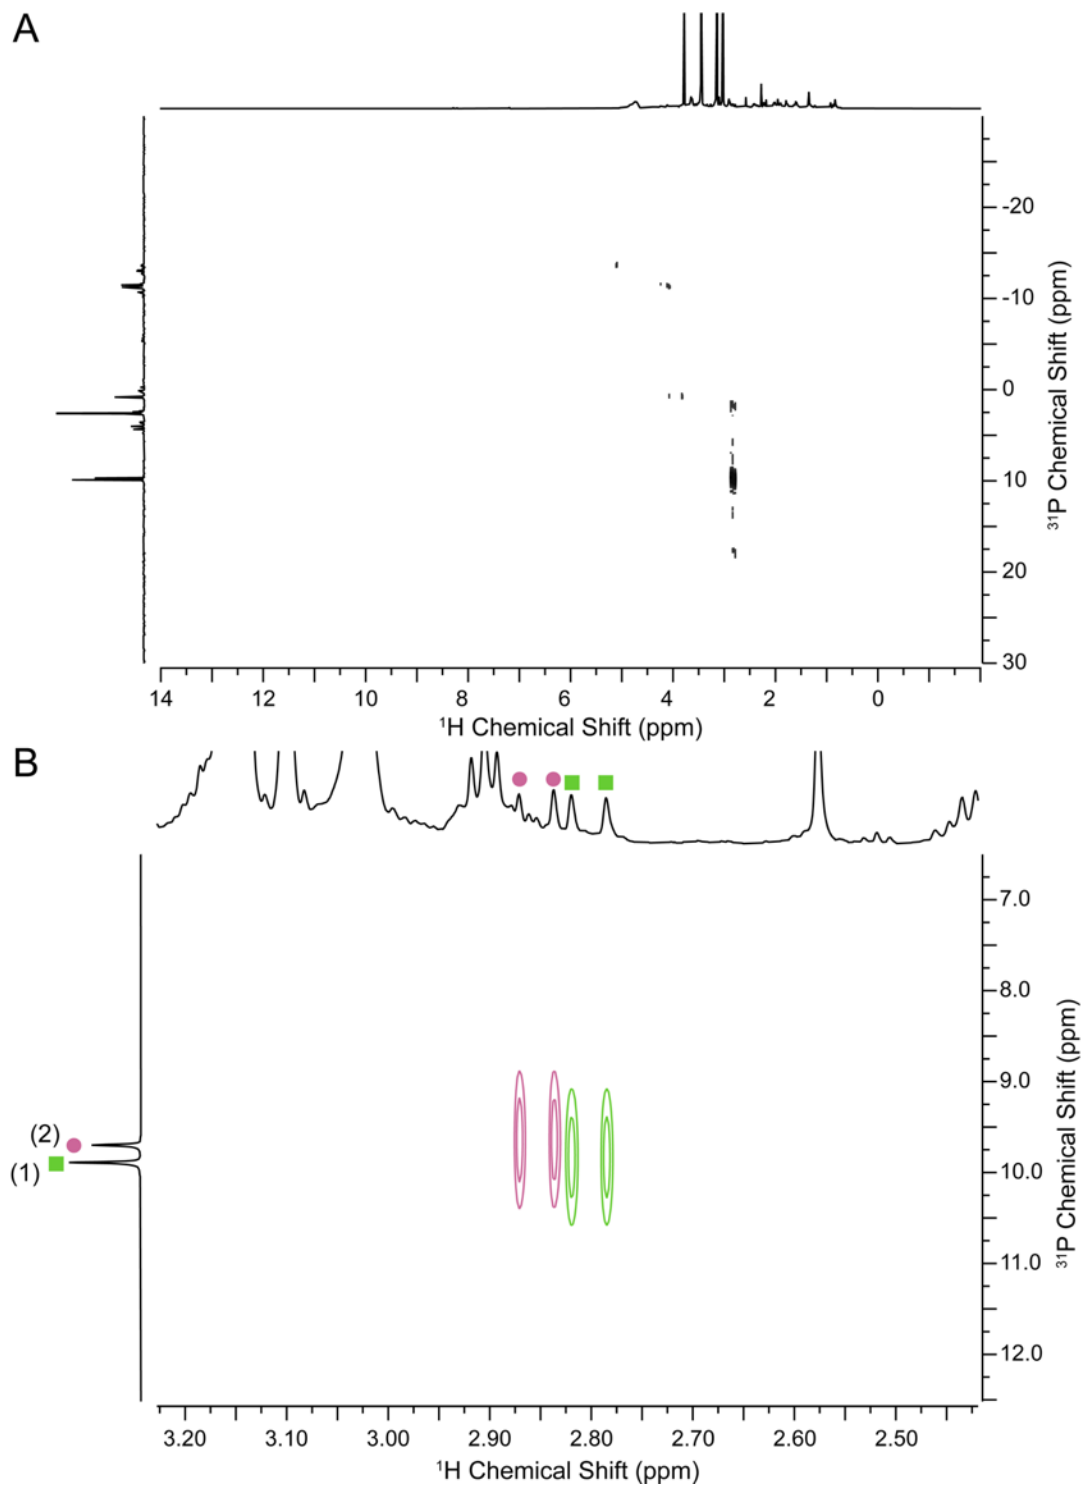

**Figure S2.**  $^1\text{H}$ - $^{31}\text{P}$  HMBC NMR spectrum of *psfABC*-expressing *E. coli* cell lysate. (A) Full spectrum indicates large cross-resonances at  $\sim 10$  ppm ( $^{31}\text{P}$ ) and  $\sim 3$  ppm ( $^1\text{H}$ ). (B) Zoom in on this set of resonances shows that each phosphorus signal is coupled to unique protons, each presented as a doublet due to the  $\frac{1}{2}$  spin of the  $^{31}\text{P}$  nucleus. The cross peaks can be directly observed in the 1D  $^1\text{H}$  spectra traced above. Cross peaks correlated to compound 1 are represented in green, those to compound 2 are represented in pink.

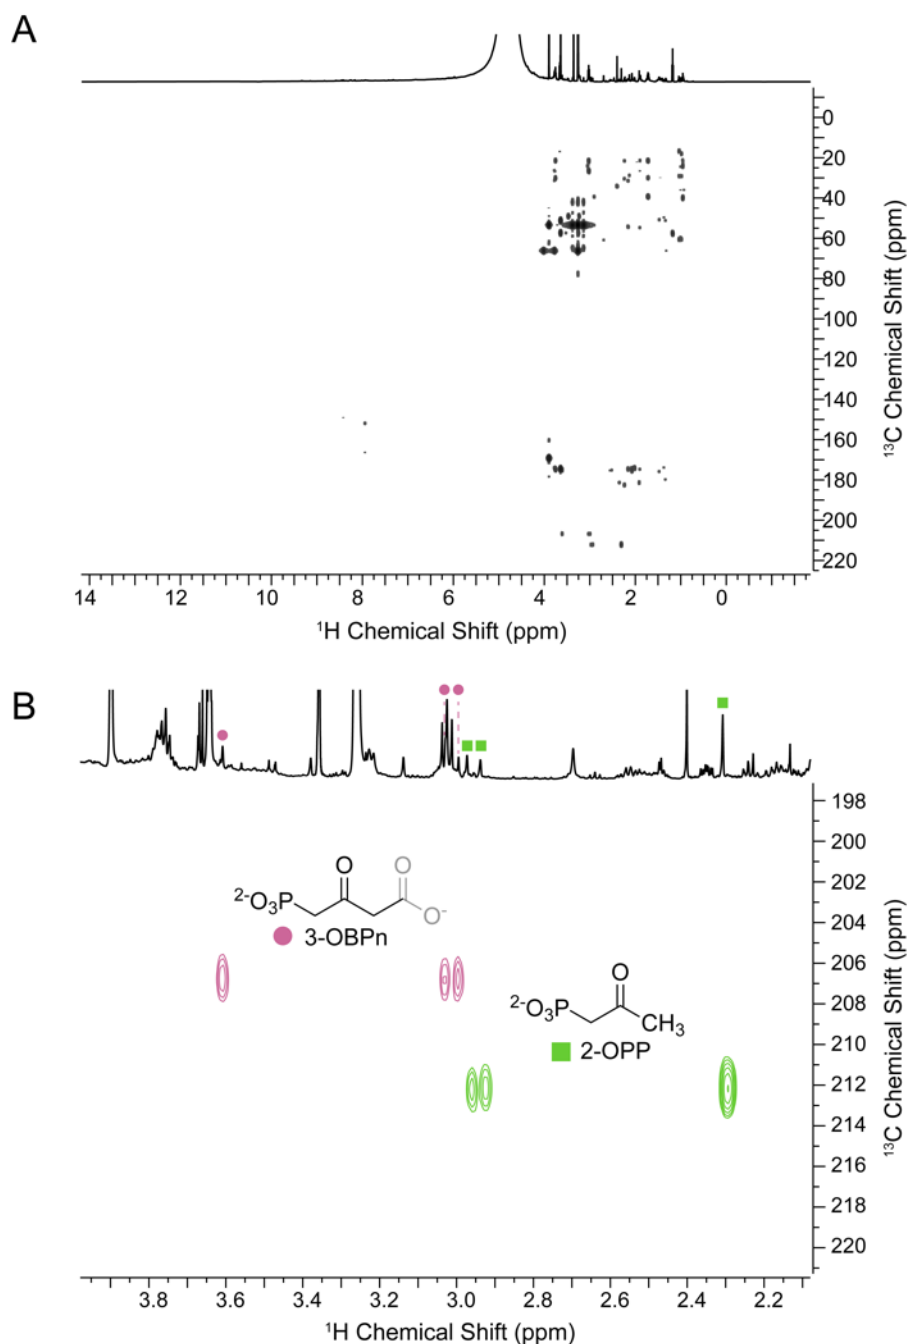

**Figure S3.**  $^1\text{H}$ - $^{13}\text{C}$  gHMBCAD NMR spectrum of cell lysate of *E. coli* expressing *psfABC*. (A) Full spectrum indicates only two sets of  $^{13}\text{C}$  cross peaks correlate to the protons identified in Figure S2. (B) Zoom in on this set of resonances shows that these protons correlate by  $^2J$  coupling to carbonyl carbons at approximately 206-212 ppm. The protons associated with compound 1 in green at 2.95 ppm are coupled to the same carbonyl resonance as an additional set of protons centered at 2.30 ppm. When integrated, these two signals have a ratio of 2:3, providing support for their assignment to the methylene and methyl groups of 2-OPP, respectively. The protons at 3.05 ppm associated with compound 2, shown in pink, are correlated with a  $^1\text{H}$  resonance at 3.6 ppm in addition to a carbonyl carbon at  $\sim$ 207 ppm. Thus, the structure drawn in black is supported by these data but the part of 3-OBPn drawn in light grey is hypothetical. However, the assignment of the product 2 to 3-OBPn is also supported by spiking with authentic standards (see main text).

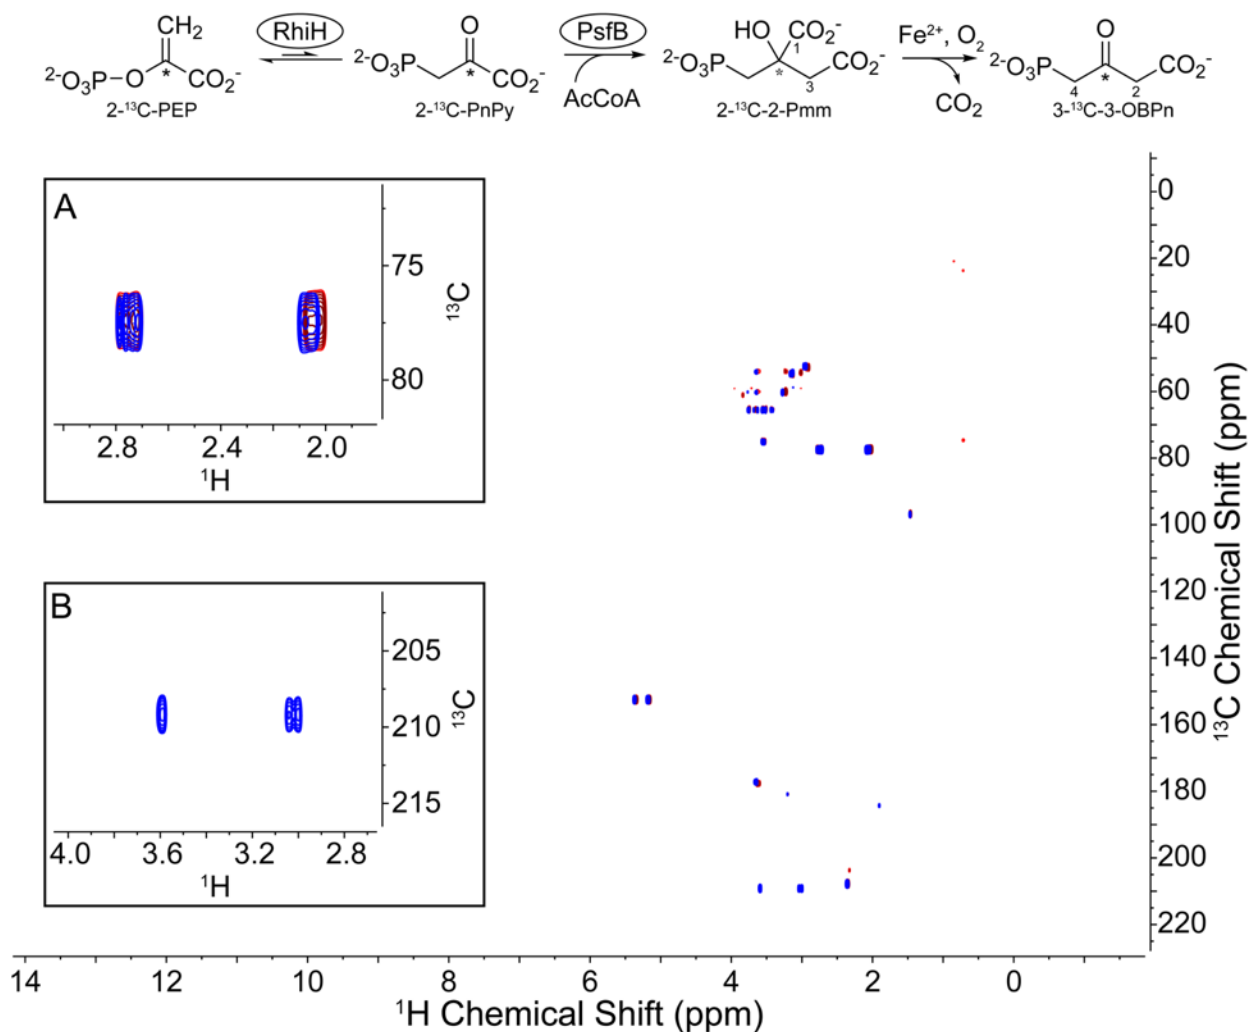

**Figure S4.** <sup>1</sup>H-<sup>13</sup>C gHMBCAD spectrum of 3-OBPn. 2-<sup>13</sup>C-2-Pmm generated enzymatically from 2-<sup>13</sup>C-PEP was reacted with ferrous ammonium sulfate and molecular oxygen to form 3-<sup>13</sup>C-3-OBPn *in vitro*. The asterisk (\*) represents the <sup>13</sup>C-label in the molecule. Overlaid <sup>1</sup>H-<sup>13</sup>C gHMBCAD data for 2-<sup>13</sup>C-2-Pmm and its oxidative decarboxylation product are shown. Cross peaks shown in red correspond to unreacted 2-Pmm, where blue peaks correspond to peaks in the sample after reaction (unreacted starting material). Inset A corresponds to both methylene protons of 2-Pmm in the starting material and in the sample after reaction (unreacted starting material). Inset B shows the formation of a new product with resonances at ~3.0 ppm and ~3.6 ppm that couple to the labeled carbon that has a chemical shift near 210 ppm. The cross-peak doublet at ~3.0 ppm for the C4 protons is due to the ½ spin of the <sup>31</sup>P nucleus. The singlet at ~3.6 ppm corresponds to the C2 methylene protons that also couple to the <sup>13</sup>C labeled carbon with a chemical shift near 210 ppm.



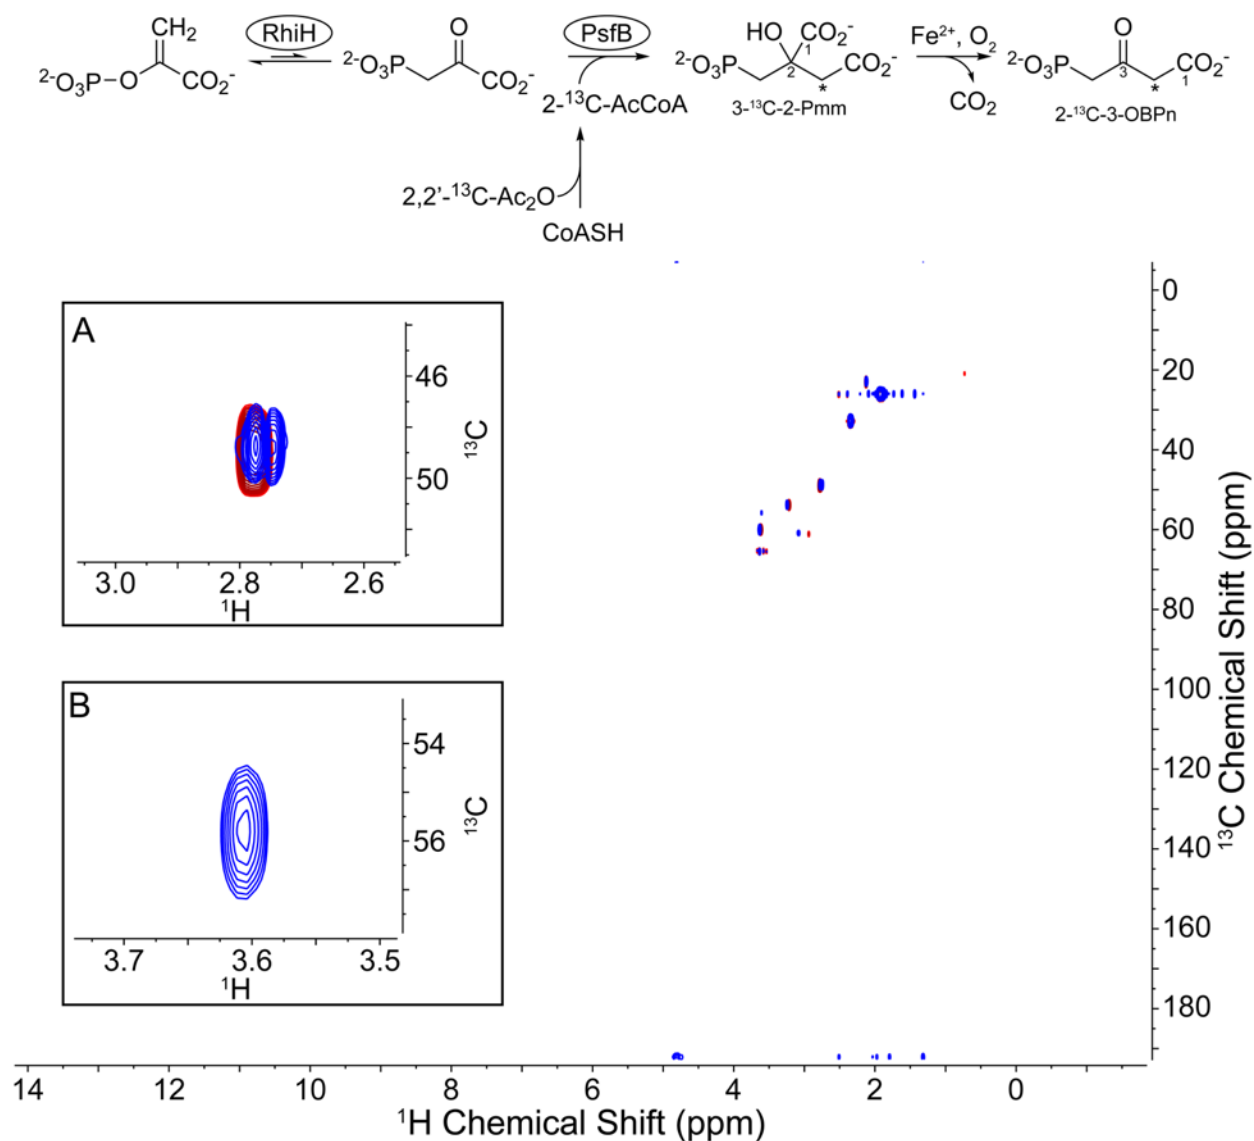

**Figure S5.**  $^1\text{H}$ - $^{13}\text{C}$  HSQCAD spectrum of 3-OBPn.  $3\text{-}^{13}\text{C}$ -labeled 2-Pmm generated enzymatically using  $2\text{-}^{13}\text{C}$ -AcCoA was reacted with ferrous ammonium sulfate to form  $2\text{-}^{13}\text{C}$ -3-OBPn *in vitro*. The asterisk (\*) represents the  $^{13}\text{C}$ -label in the molecule. Overlaid  $^1\text{H}$ - $^{13}\text{C}$  HSQCAD data for  $3\text{-}^{13}\text{C}$ -2-Pmm and its decarboxylation product are shown. Cross peaks shown in red correspond to unreacted  $3\text{-}^{13}\text{C}$ -2-Pmm, and peaks in blue correspond to 3-OBPn product. Inset A shows 2-Pmm  $^1\text{H}$  signal coupled to the labeled carbon in starting material (red) and in unreacted starting material after the iron-catalyzed reaction (blue). Inset B shows the crosspeak of the  $^{13}\text{C}$ -labeled C2 methylene carbon of the product  $2\text{-}^{13}\text{C}$ -3-OBPn with the same protons at 3.6 ppm observed in *SI Appendix Figures S3-4*.

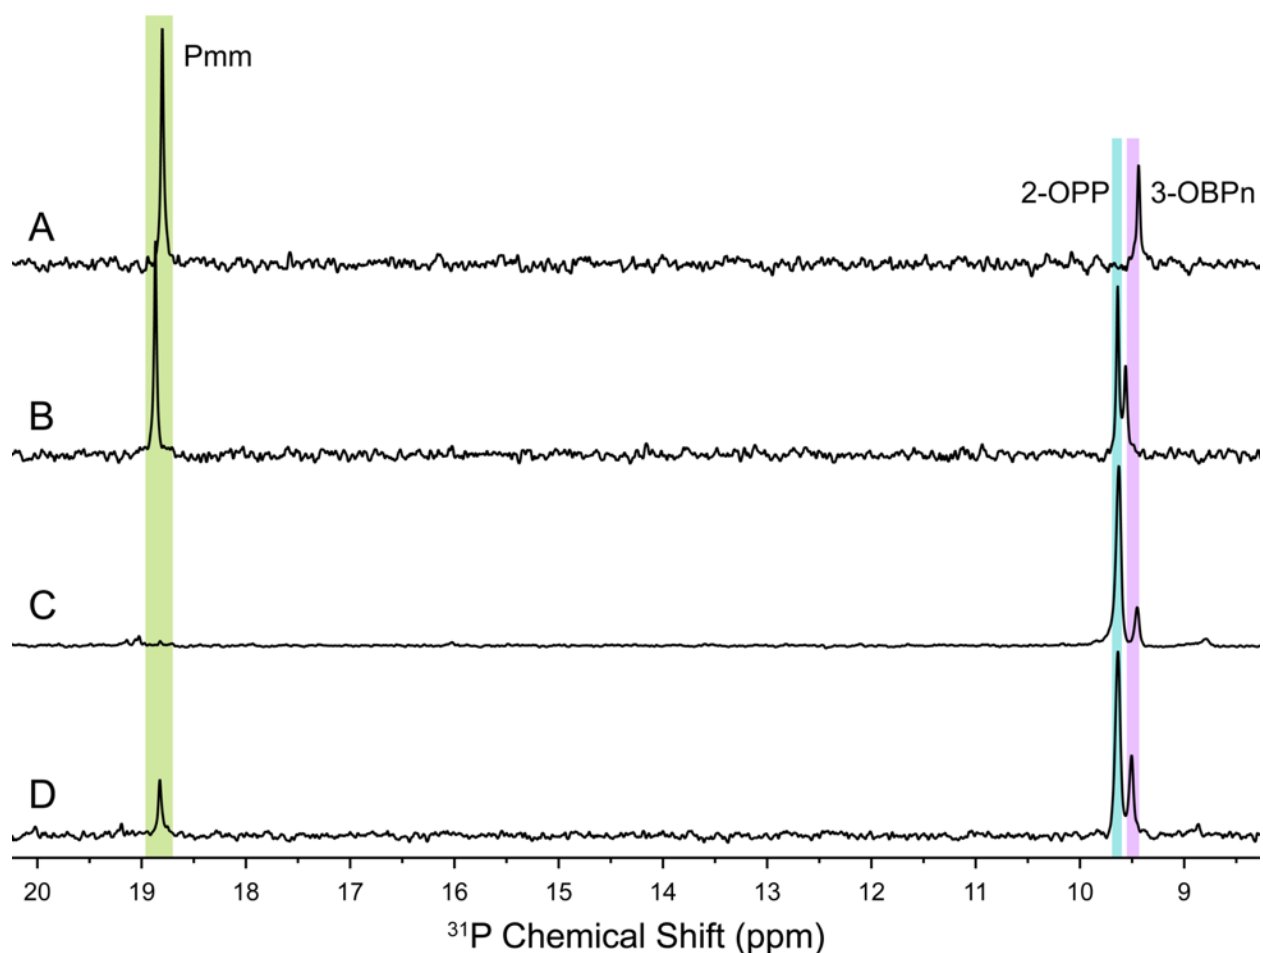

**Figure S6.**  $^{31}\text{P}$  NMR spectra of synthetic 2-OPP and semi-synthetic 3-OBPn standards. These standards were spiked into lysates of *E. coli* cells that expressed *psfABC*. (A) Product of the Fe-catalyzed non-enzymatic decarboxylation of Pmm. (B) Addition of authentic 2-OPP to (A) demonstrates that the product in A has a chemical shift that is upfield from 2-OPP. (C) Lysate of *E. coli* cells that co-expressed PsfABC. (D) Addition of the sample from panel A to the sample of panel C results in an increase in the intensity of the upfield peak (from 11.6 to 28.4% compared to 2-OPP abundance).  $^{31}\text{P}$  chemical shifts are sensitive to pH near their  $\text{pK}_a$  resulting in small shifts from experiment to experiment.

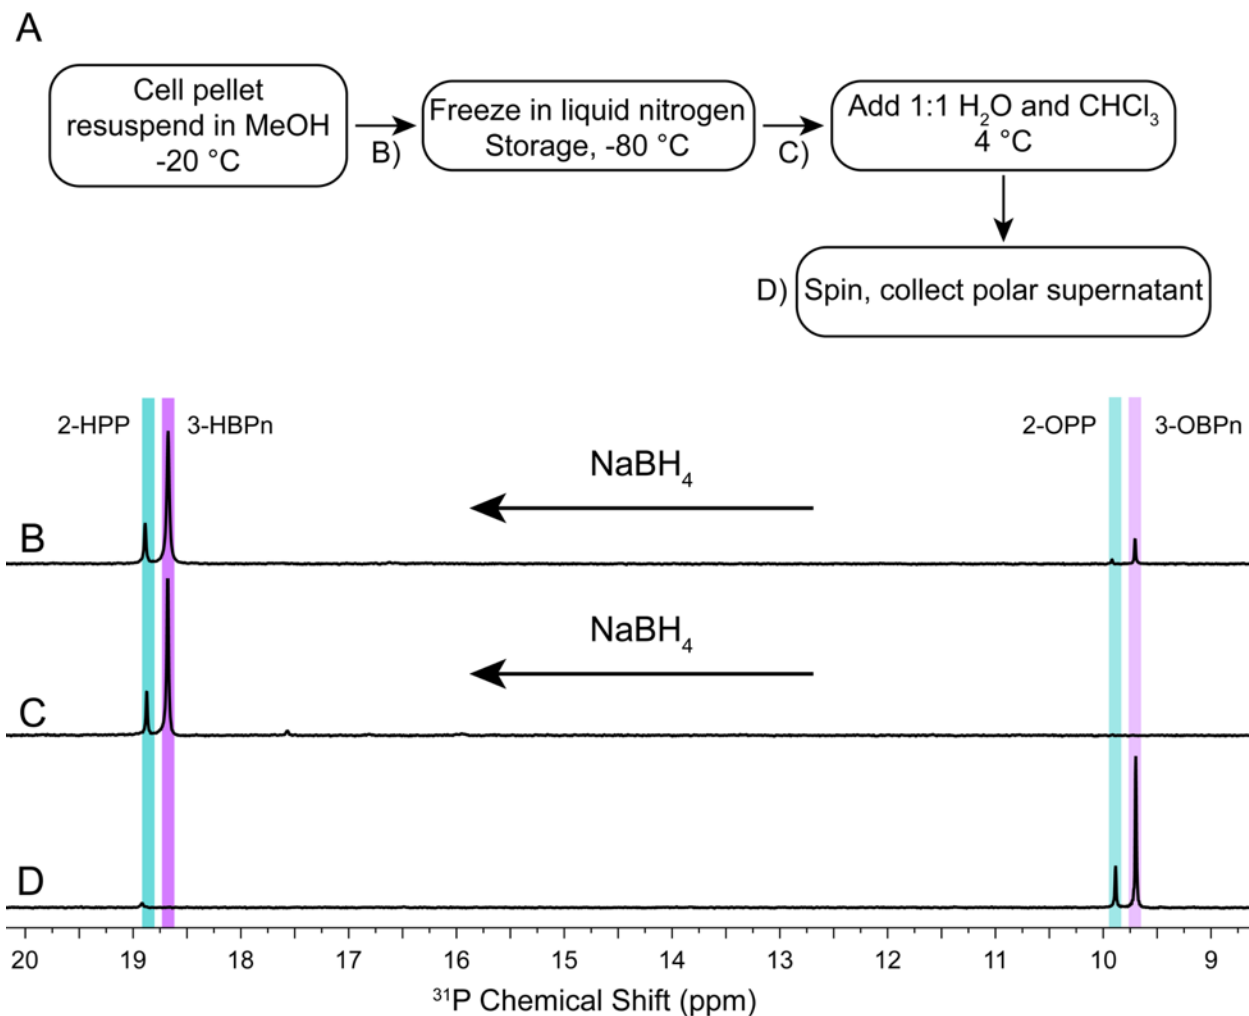

**Figure S7.** <sup>31</sup>P NMR spectra for chemical reduction of lysates of *psfABC* expressing *E. coli* cells. (A) General scheme for work-up illustrated for preparing cell lysates. NaBH<sub>4</sub> was added as indicated at points “B” and “C.” (B) Cell lysate was treated with NaBH<sub>4</sub> upon methanol extract of washed cell pellets. Near complete reduction of 2-OPP and 3-OBPn is observed. (C) Methanol extracts were thawed from storage at -80 °C to 4 °C, and NaBH<sub>4</sub> was subsequently added alongside cold water and chloroform (4 °C). Complete reduction is observed with similar product ratios between 2-OPP/2-HPP and 3-OBPn/3-HBPn as in (B) and in panel D. (D) Lysate from non-treated cells that produced 2-OPP and 3-OBPn. The small peak at ~19 ppm corresponds to 2-Pmm in this sample. Ratio of 2-OPP:3-OBPn is consistent between untreated and treated cells.

```

* * . . . . .
WP_018249103.1 -----MYMDFHCHTKISKK-FEFELDRFKRIIKTAKKNGLDALIALTEHF
WP_054877098.1 -----MDIDLHCHAKLSKK-SQFSRSNFNLIIRAALRSGFHAIIVTEHF
KU058778.1 -----MDIDLHCHAKLSKG-SSFNIKHFLLKIKKSALRNLQAIALTEHF
WP_088104464.1 -----MKIDFHTHVKLSKK-SPFLAAYFVEMMQEAKASGLDAIIVTEHF
WP_091234269.1 -----MKIDLHTHVKLAKK-TSFSHDYFKEMMAEARINGLDAVAMTEHF
PsPsfC MVRACRISDGVIMNRKVVDTHTVHLLLSKKQRPDWAAIKRMLDVAKVDELDAICVTEHI
Ps106PsfC -----MKRTILDHVVHLLMWKQQAEPDWSVSQTLKVANFNELDAICITEHI
BsPsfC -----MKLDTHVHLLISK-TARPDWDEIRFTLDAARRNGLDALCICEHL
GbPsfC -----MKIDTHTHFLP-KKNSAPDWKIIQFYFQVARHHDNLVICFTEHL

```

```

*
WP_018249103.1 HTVNFYDIYKTLDRNYQYN-----GDYYDVDGFKVFCGMEVDIKERGHIIIVGRKEDLL
WP_054877098.1 NTSGFEDIYELMD-SYPYI-----DDHYIIDGLKVFCEGMEVDIKEGGHVAIIGKRDDVS
KU058778.1 DTNRFTEIYEVLEQHYQYQ-----NDYFNIEGLKVFCEGMEVDIKEGGHVLIGKREDVL
WP_088104464.1 NTLRFQDIYEFLDQNYDYR-----QHYYEAEQMKVFPGIEVDIKETGHILLIGPREHIL
WP_091234269.1 NTWRYEDIYDVLDAANYPE-----HGYYVAEGVKVFPGIEVDIQTGHILLIGQRENVL
PsPsfC EADGYQTLMEGLFVENRPLGGDQAHAGRLTY-QGVAIFPGAELHLANRNTNVGVHTDLEGLL
Ps106PsfC EADAYEKLMLGLFCSNRLGGSTQGDGGSVIC-NGVLVLPGAELHLANNMNIGVHADLETLL
BsPsfC DAVHYPDLLLEGVFDVNRVGGERLAPGVLRLLESGLLSSGAEVSLRGGGDAGVHAPPDVL
GbPsfC DADFYENVLNSIFEENCFSGEILNDGLIRLPNSLLSSGTEISLAGGADVGLHAKPSVIK

```

```

* *
WP_018249103.1 DLRALFPEVIRENEFPTLKYLIIDEAE--KRNLKVGHPAKRSKYLVDMDPSLLGRLDGL
WP_054877098.1 SLHNVLSPNLNKENYPSIDYLIKEAK--KRNMIMIGAHSYRNKSLSNLPDDILKQLDFL
KU058778.1 SLHKELSPFLAGNTYPSLEYLTEEAN--KREMIKIGAHPLRNDNPLGKLPDPTLLKQLDFL
WP_088104464.1 AIREALEPHTHEQDFIQFDRLDLVE--GYNILKIGAHPYRSSTPLHHSIEQLSRLDAF
WP_091234269.1 ELRGRLEPYTEKGEFIKFETLLDWSE--EGGFLRIGAHPFREGTPLHHLPEDELRRLDAF
PsPsfC ALDRA-----PGAYTLERLHAVLEQRGRPFKLVAAHIFWPGKTCDDLQ-ALGRYVNAI
Ps106PsfC SLDRR-----ASAYTLDTLHGLLEKGRPFKLVAAHIFWPGKTCSDLE-ALKRCINAI
BsPsfC RLERQ-----KGFYSLPELLDVLKAGGETAVVAHHVYFGRKWIDELP-VVGKQLSAI
GbPsfC KLNKT-----KGFYTLDFLAEELTLDSDNYILVAHHLFRTGKWIDNID-KKSALIDAI

```

```

* . * *
WP_018249103.1 GLNGKALNLK-----DEVAALSKRVNPMVAGSDTHHVLHMGTVKNRFYTEHDT-----
WP_054877098.1 ELNGKDYKKS-----HMVMRLAQSLNMKVTAGSDTHYWLQMGICIRNRLNAEANT-----
KU058778.1 ELNGKDIKKS-----SCVFQLAERLDLPVAGSDTHLWLQVGCVRNRLDKDCTT-----
WP_088104464.1 DLNGKDQYSQGLKENYQVMALGERLNIPIIGGSDTHHFQYGCISNRFARACET-----
WP_091234269.1 DLNGKDIYSQGLKPYQAKINPFAELLGKPVVGGSDTHQFMQYGSVNVHFDEEFKT-----
PsPsfC EVPAKDLANA-----QNYVALAETLALDTTGGSDAHTFIQVGACRTAFELPGSVR-----
Ps106PsfC EVPAKDLTNI-----HKYLTLASTLNLDTTGGSDSHSFISIGACKTLINEDNTHS-----
BsPsfC ELPKDLASR-----EKYELLAARLELPLVGGGDGHTWLQIGACHTEIDEAEWPDASVF
GbPsfC ELPPKDITQE-----SKYRELSLETGKPFVAGSDSHTWLQLGVGATYVDELNFDG-NNF

```

```

WP_018249103.1 -IAGIKEAIANREFETVISKGAKLAAAAGQVAKKI AKRFKELKESQAV----
WP_054877098.1 -IEELRKALSKSNT-IIISPVIKLVKAAAQVKKIMKQFQRVSF-----
KU058778.1 -VSQIKAAL EEGKYDTCITSGINIKLSCAKI AKKILKLSARNRTDVFHNHN
WP_088104464.1 -IEELRSNIVDRAYEIEQSSCLYTKVKA AKLVKLLKKLLENVSEALDEFV-
WP_091234269.1 -VQELKELIHRAAYHIEVSPCLET KVKAANI KALLKQNL S IPEEVV-----
PsPsfC -DCTAQDWISSRQTSHLFTAQSPRLVMSNIYRQSLMG-----
Ps106PsfC -PLTLKKWLHSHHTTHEPDRDSLRLTALARIHRQT DTERREP-----
BsPsfC SIARLKGALKRYRAE PVAVAGADRLVRMSRIYRQRLEQAAA-----
GbPsfC NLKEFKQLINRKMVEPVVSSDALSQVELSTLYRMEFLA-----

```

**Figure S8.** Sequence alignment of selected PsfC-like proteins. Accession numbers in purple are associated with proteins encoded in putative phosphonate BGCs based on gene context, and whose function was verified *in vivo* in this study. Accession numbers highlighted in orange are associated with BGCs that do not have a known function. Residues were highlighted based on four consensus types. Residues highlighted in green are invariant residues conserved amongst all sequences, independent of their genomic context and implied function. In purple are residues that are conserved amongst proteins encoded within a phosphonate biosynthesis context, but not conserved in the other protein sequences. In orange are variable residues within the phosphonate-associated sequences but that are conserved in the sequences from non-phosphonate BGCs. Highlighted in pink are positions that are conserved in phosphonate-related and non-phosphonate BGCs but are distinguished from each other (e.g. residue 26 is a conserved lysine for non-phosphonate proteins, but a leucine for phosphonate-associated proteins). Residues targeted for mutagenesis that impact the activity of PsfC are shown with an asterisk (\*) above the corresponding position. Residues that did not completely impede function when mutated to alanine are shown with a dot (•) above the residue. The methionine start site used for purifying *PsPsfC* is underlined.

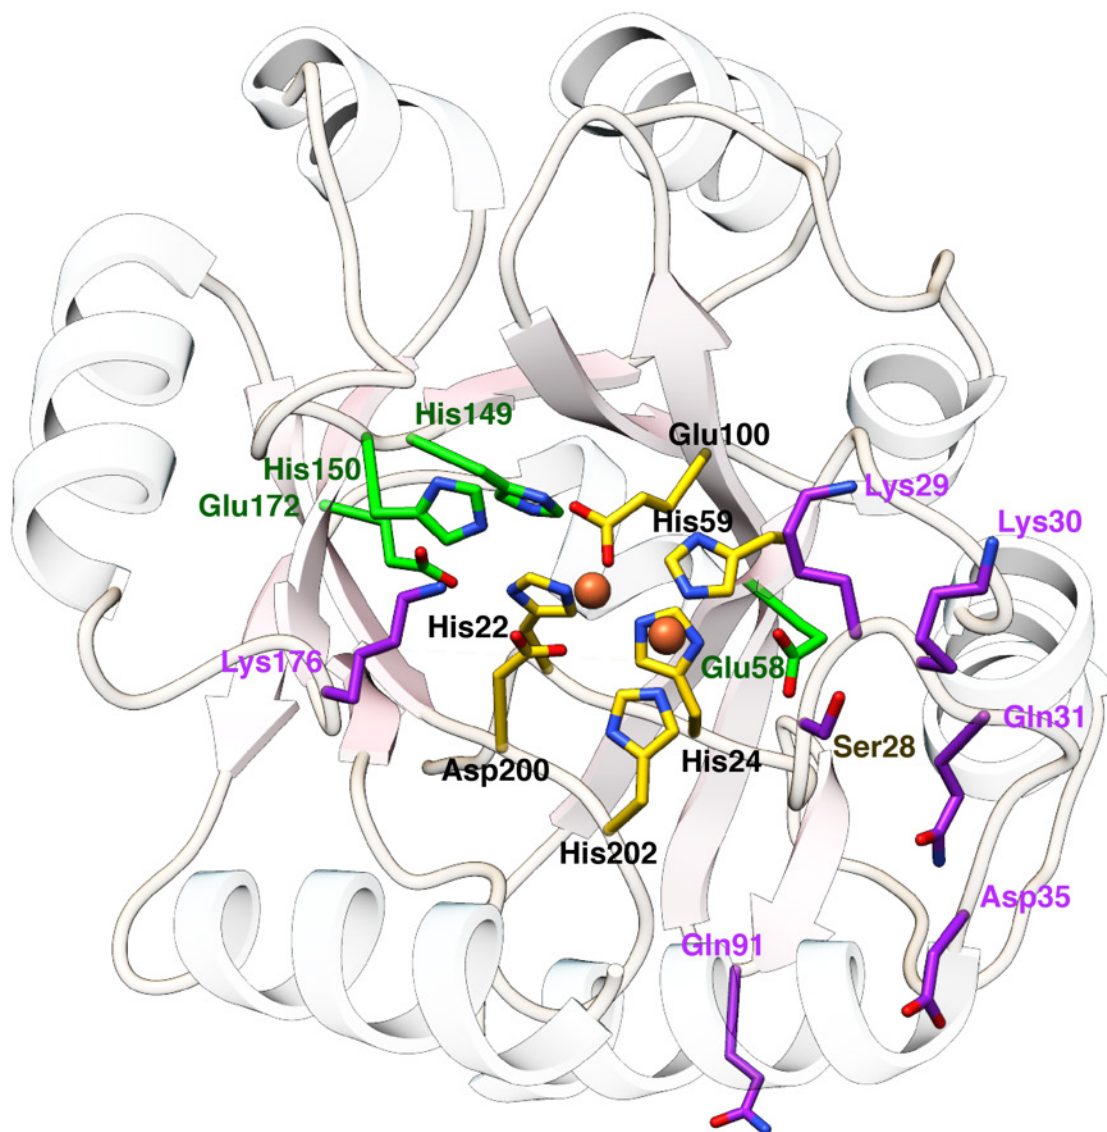

**Figure S9.** Structure of PsfC showing the residues that were substituted by alanine to assess their importance for catalysis. Residues shown in gold abolished activity. Residues shown in purple had a negligible effect on activity. Residues shown in green aberrated function of the enzyme but are not expected to be metal ligands.

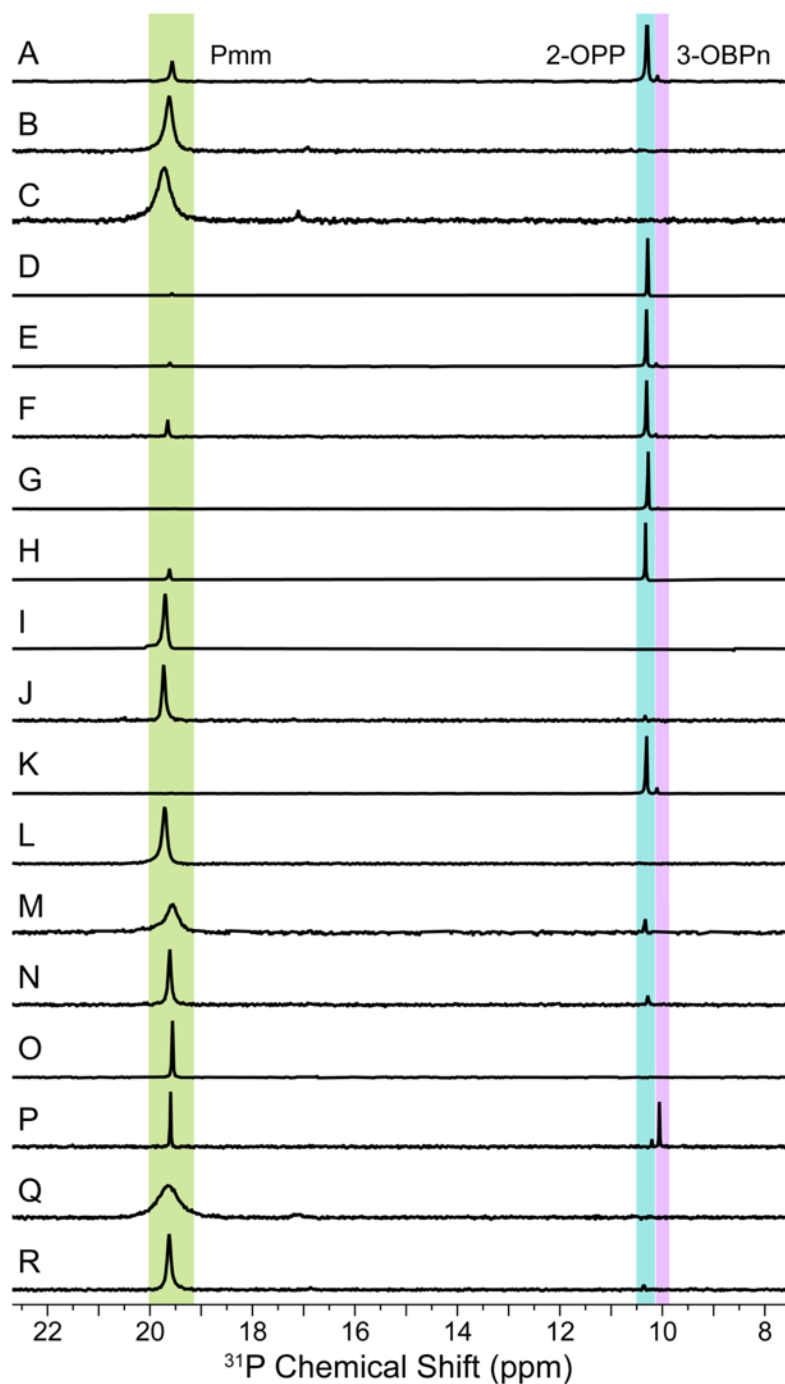

**Figure S10.** Activity of PsfC variants when co-expressed with PsfAB in *E. coli* determined by  $^{31}\text{P}$  NMR spectroscopy. A) Wild-type (WT) *psfC* co-expressed with *psfAB*, and (B-R) *psfC* variants: B) His22Ala, C) His24Ala, D) Ser28Ala, E) Lys29Ala, F) Lys30Ala, G) Gln31Ala, H) Asp35Ala, I) Glu58Ala, J) His59Ala, K) Gln91Ala, L) Glu100Ala, M) His149Ala, N) His150Ala, O) Glu172Ala, P) Lys176Ala, Q) Asp200Ala, and R) His202Ala.  $^{31}\text{P}$  chemical shifts are sensitive to pH near their  $\text{pK}_a$  resulting in small shifts from experiment to experiment. Compound identity was confirmed by  $^1\text{H}$ - $^{31}\text{P}$  HMBC NMR. All experiments involve work-up conditions that convert most 3-OBPn to 2-OPP.

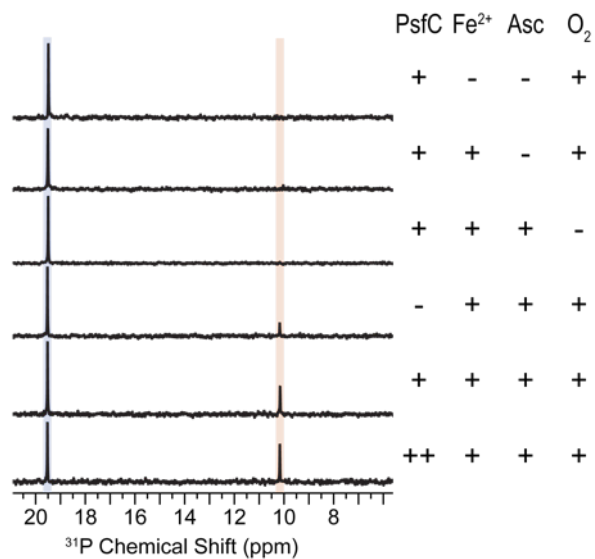

**Figure S11.** <sup>31</sup>P NMR spectra of *in vitro* assays with PsfC. Depicted is the phosphonate region of the <sup>31</sup>P NMR spectra; peaks corresponding to 2-Pmm (blue) and 3-OBPn (orange) are indicated. Assays were performed with 2-Pmm (1.2 mM final concentration) and PsfC-M2 (100 μM where indicated, “+”) with or without added components determined to be necessary for multiple turnovers – O<sub>2</sub>, Fe<sup>2+</sup>, and ascorbate (“Asc”). Increase of PsfC-M2 concentration from 100 to 150 μM increased product formation (“++”).



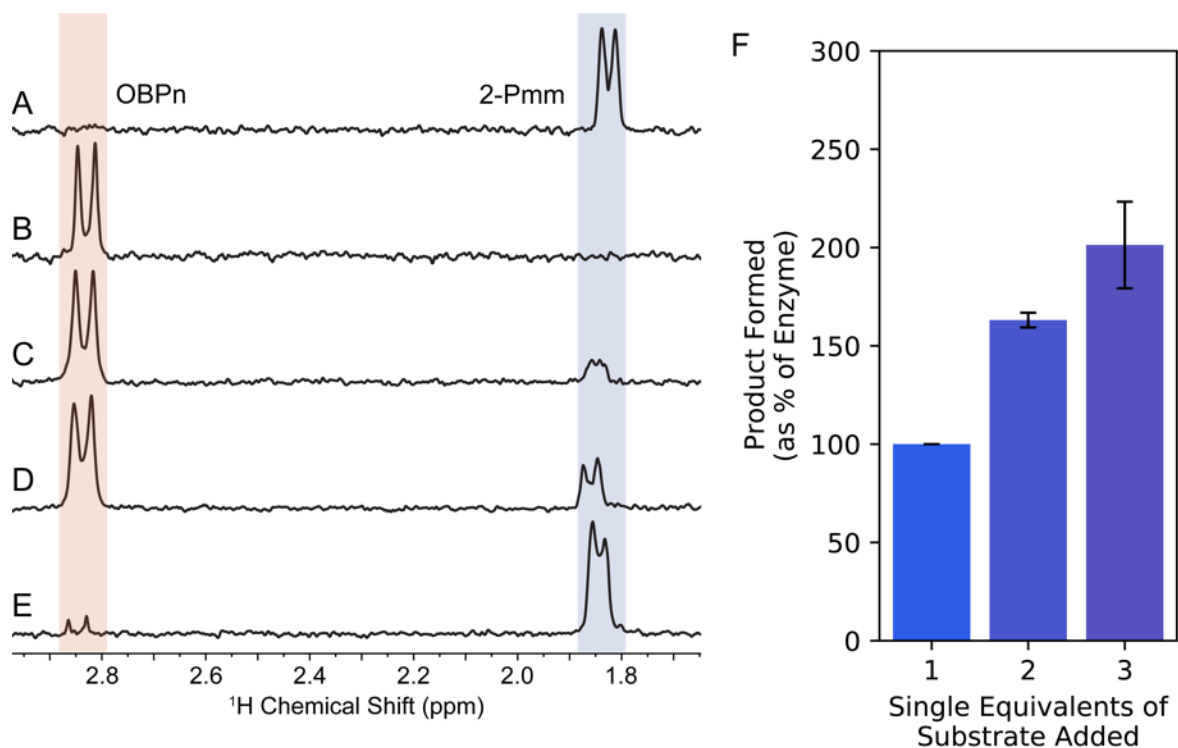

**Figure S12.** <sup>1</sup>H NMR spectra of the upfield region of the products of single-turnover assays of Fe-reconstituted PsfC. 2-Pmm was assayed with Fe-reconstituted and twice-dialyzed PsfC under aerobic conditions. Reactions were quenched 30 s after addition of substrate by addition of EDTA to 15 mM. A) Control reaction showing that 100 μM 2-Pmm (~1.8 ppm) added to dialysis buffer (containing non-protein-bound Fe) shows no product formation. B) Reaction of 100 μM 2-Pmm with 100 μM Fe-reconstituted PsfC shows complete turnover to 3-OBPn (~2.9 ppm). C) An additional equivalent of 2-Pmm (total 200 μM) was added 30 s after taking the spectrum of the sample in B. D) A third equivalent of 2-Pmm (100 μM, total 300 μM) was added to the sample in panel C. E) Reaction performed as in B but with 200 μM 2-Pmm added as single addition to PsfC shows less turnover than two consecutive single-turnover reactions with 100 μM (reaction C). Data shown are <sup>1</sup>H projections of <sup>1</sup>H-<sup>31</sup>P HMBC spectra recorded as described in *Materials and Methods*. F) Product formed in B-D as proportion of substrate added indicates PsfC can perform multiple turnovers when substrate 2-Pmm is not in excess over enzyme.

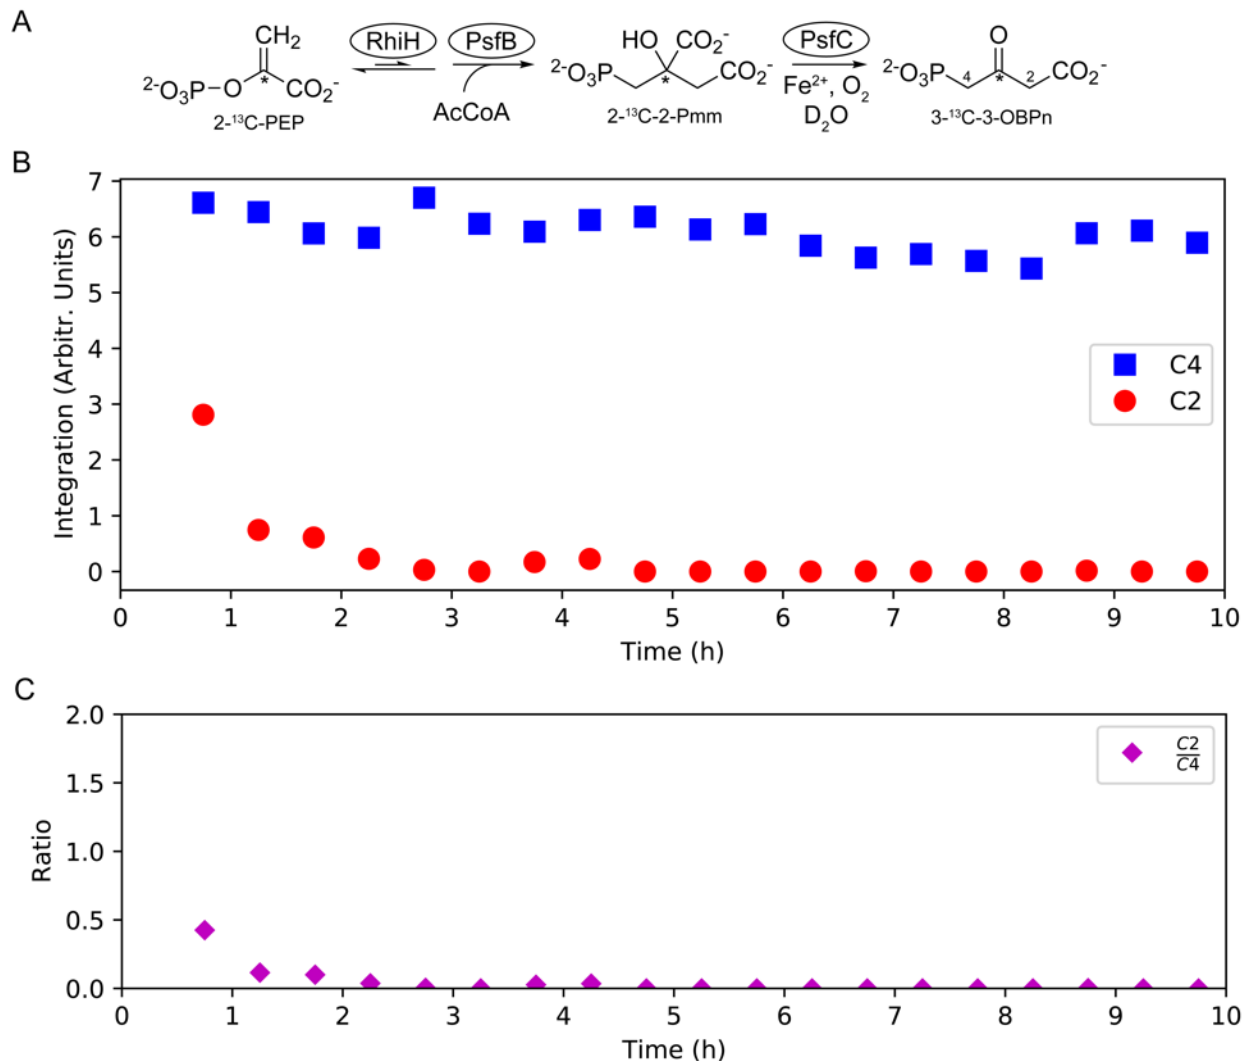

**Figure S13.** Probe of hydrogen-deuterium solvent exchange at C2 and C4 of 3-OBPn. A)  $3\text{-}^{13}\text{C}$ -3-OBPn was produced enzymatically, and B) the product was monitored over time by  $^1\text{H}$ - $^{13}\text{C}$  gHMBCAD. Integrations of peaks corresponding to protons at C2 (red) and C4 (blue) of  $3\text{-}^{13}\text{C}$ -3-OBPn dissolved in  $\text{D}_2\text{O}$  were averaged over three experiments and plotted over time. The intensity of the signal corresponding to the protons at C2 decreases as a result of exchange with deuterium from solvent. The intensity of the signal from the protons at C4 does not change over time indicating they do not exchange with solvent. C) The corresponding ratio of C2/C4 decreases to 0 after 1-2 hours of incubation in  $\text{D}_2\text{O}$ .

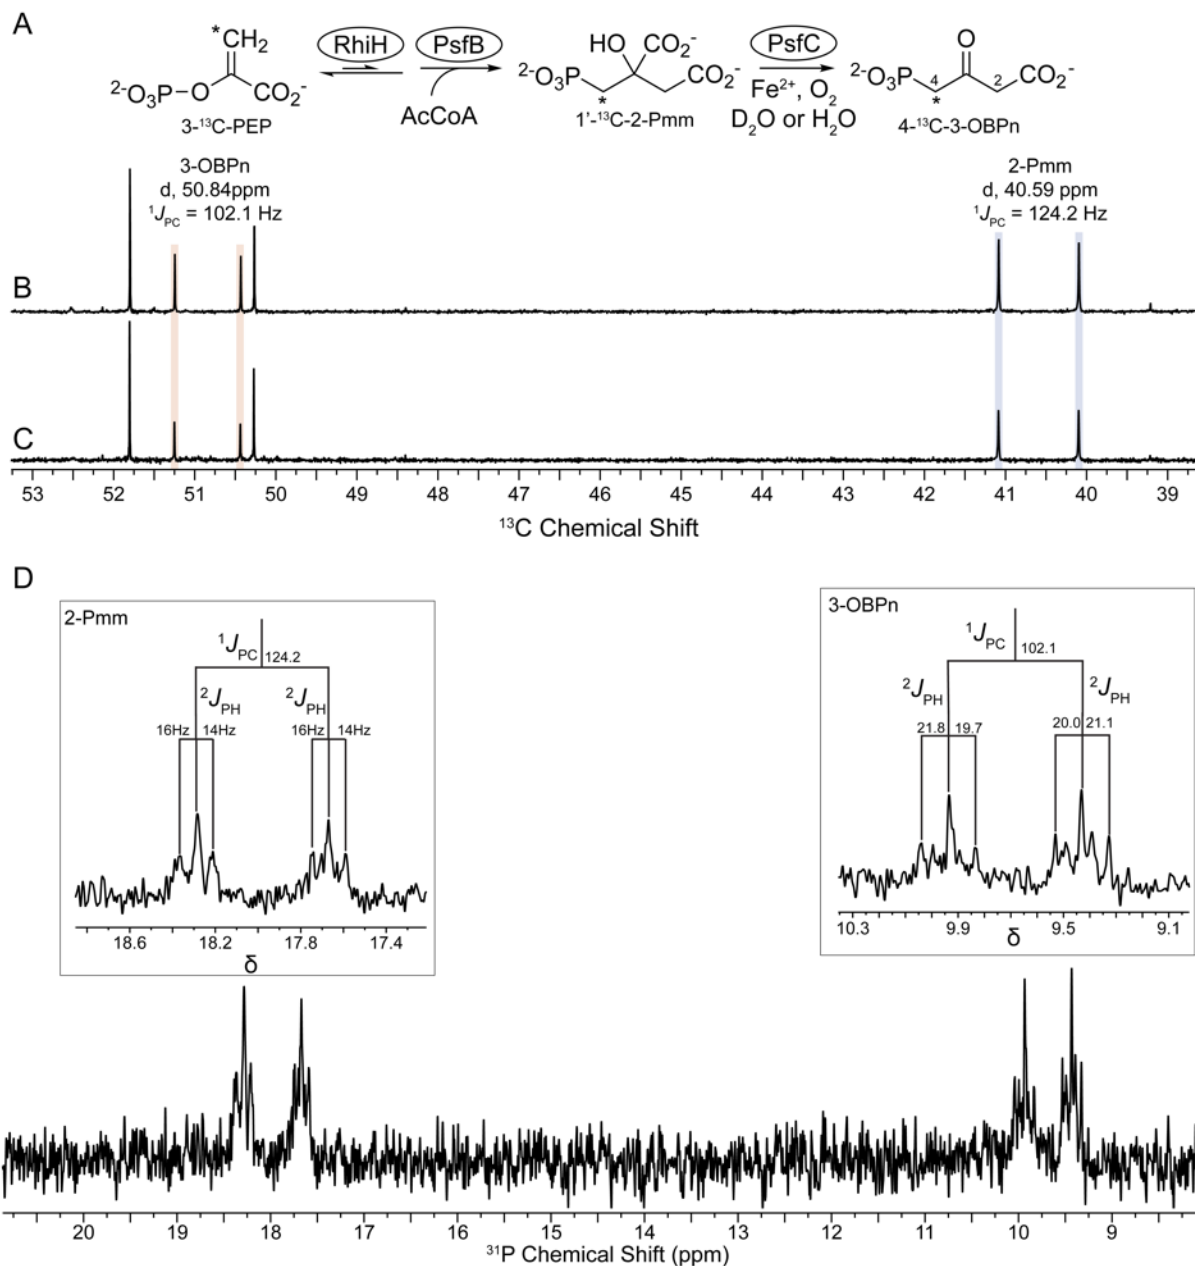

**Figure S14.** 1D- $^{13}\text{C}$  and  $^{31}\text{P}$  NMR spectra of 3-OBPn product generated by PsfC in  $\text{D}_2\text{O}$  and in  $\text{H}_2\text{O}$ . A)  $4\text{-}^{13}\text{C}$ -3-OBPn was produced by PsfC in  $\text{H}_2\text{O}$  or 80%  $\text{D}_2\text{O}$  and monitored by  $^1\text{H}$ -decoupled  $^{13}\text{C}$  NMR; no difference was observed for reactions performed in (B)  $\text{H}_2\text{O}$  or (C)  $\text{D}_2\text{O}$  (80%). (D)  $^1\text{H}$ -coupled  $^{31}\text{P}$  NMR spectrum of the sample in C illustrates both 2-Pmm (inset left) and 3-OBPn (inset right) appear as a doublet of triplets, suggesting no deuterium substitution in the product at C4.

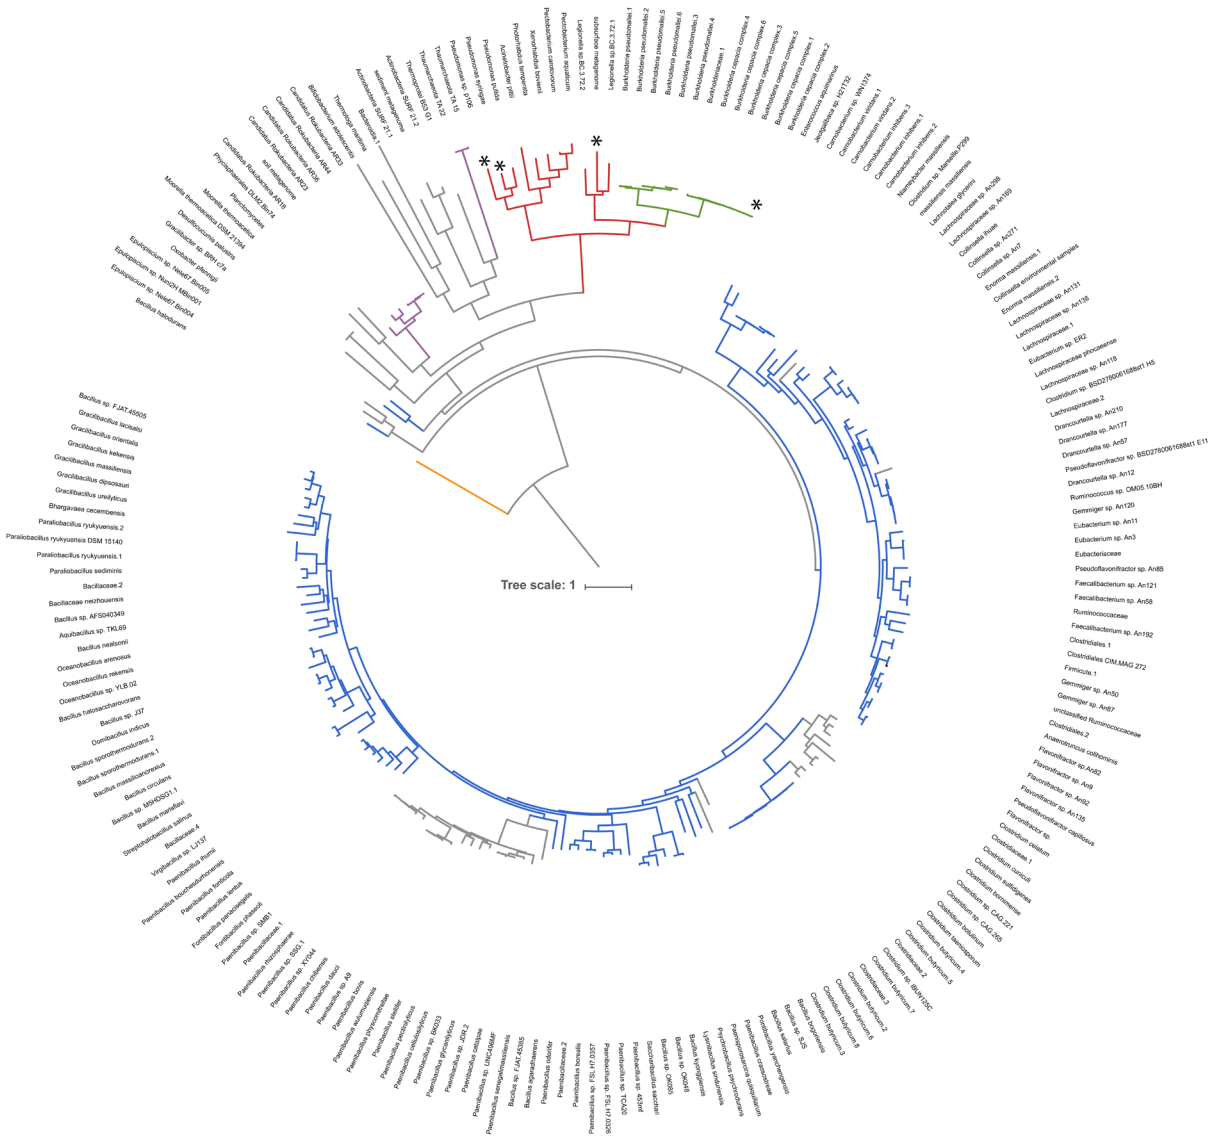

**Figure S15.** Phylogenetic analysis of PsfC. Accession numbers with organism names are listed in Table S2. Functionally verified members are denoted with an asterisk (\*).

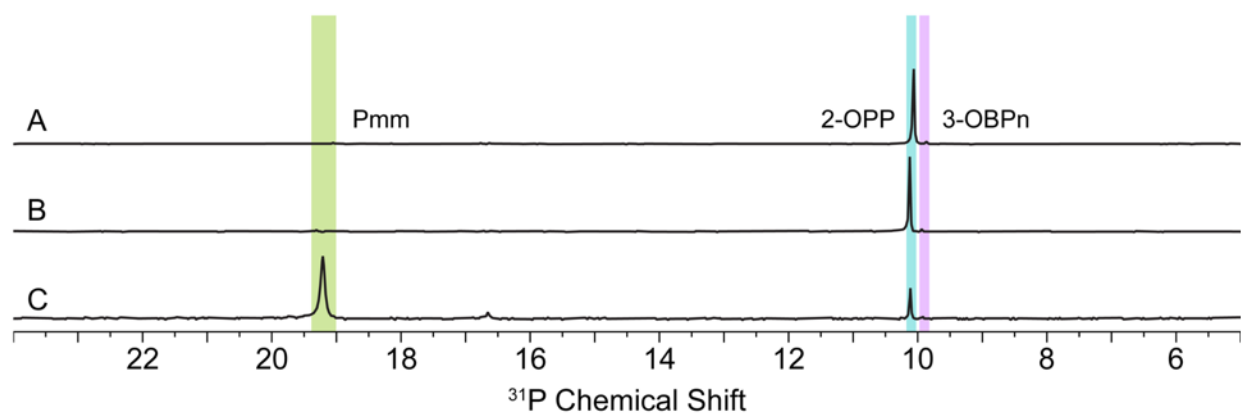

**Figure S16.** Co-expression of PsfC homologs produce the same products as PsfC from the fosfomycin pathway. Homologs from three organisms identified in the phylogenetic analysis of PsfC were individually co-expressed with *psfAB* from *P. syringae* PB-5123. All three produced 2-OPP and 3-OBPn, verified by  $^1\text{H}$ - $^{31}\text{P}$  HMBC.  $^{31}\text{P}$  spectra were recorded after co-expression of *psfAB* with *psfC*-homologs from A) *Pseudomonas* sp. p106 (*Ps106PsfC*, WP\_125924462.1), B) *Burkholderia stagnalis* (*BsPsfC*, WP\_059908919.1), and C) *Gammaproteobacterium bacteria* (*GbPsfC*, OGT51126.1).  $^{31}\text{P}$  chemical shifts of phosphonates are sensitive to pH near their  $\text{pK}_a$  resulting in small shifts from experiment to experiment. Under the work-up conditions used, 3-OBPn converts to 2-OPP.

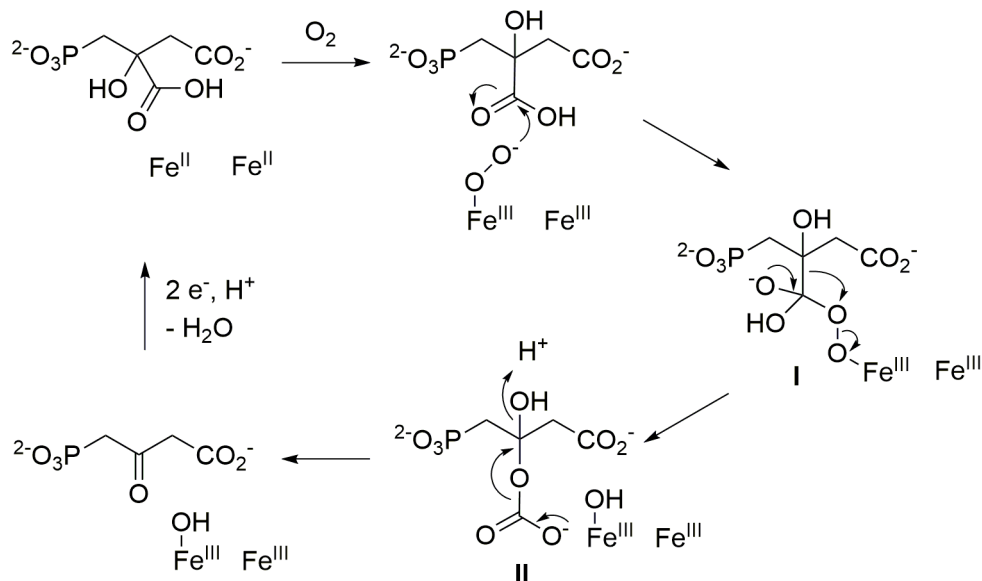

**Scheme S1.** An alternative mechanism of oxidative decarboxylation. As discussed in the main text, the mechanisms in Scheme 1 infer hydrogen atom transfer (HAT) from C2 because NMR data argue against abstraction from C4. However, direct experimental evidence for HAT from C2 could not be obtained because the protons at C2 of the product exchange too fast with solvent. As a result, a mechanism that does not involve HAT from either C2 or C4 would also be consistent with the data. One such mechanism is shown here. The two ferrous ions could provide the two required electrons to form a ferric-peroxo, which might attack the carboxylic acid (provided it was protonated or activated in some other fashion). A Criegee-like rearrangement from the tetrahedral intermediate **I** could then break the C-C bond and form carbonate **II**, which could decarboxylate to provide the 3-OBPn product. We are not aware of any precedent for such a mechanism in iron-dependent enzymes but since it would explain the data, it is shown for completeness.

**Table S1.** Average distances between Fe-Fe for select diiron enzymes.

|                 | PDB ID | Monomer | Fe-Fe (Å) |
|-----------------|--------|---------|-----------|
| sMMOH           | 1MTY   | A       | 3.04      |
|                 |        | B       | 3.14      |
| Oxy-Hemerythrin | 1HMO   | A       | 3.27      |
|                 |        | B       | 3.29      |
|                 |        | C       | 3.27      |
|                 |        | D       | 3.26      |
| CmlA            | 5KIK   | A       | 3.33      |
| AurF            | 2JCD   | A       | 3.55      |
|                 |        | B       | 3.66      |
| DOHH            | 4D50   | A       | 3.68      |
|                 |        | B       | 3.77      |
| RNR R2          | 1XIK   | A       | 3.94      |
|                 |        | B       | 3.88      |
| UndA            | 6P5Q   | A       | 4.85      |
|                 |        | B       | 4.46      |
| SznF*           | 6VZY   | -       | 5.00      |

\*SznF information taken from (16). All other distances were identified using deposited coordinates from the PDB.

**Table S2.** Accession numbers used for phylogenetic analysis of PsfC (Figure S15). Bolded members were functionally characterized in this study.

| <b>Branch label</b>          | <b>Accession Number</b> |
|------------------------------|-------------------------|
| Acinetobacter pittii         | WP_087090869.1          |
| Actinobacteria SURF 21.1     | RJP34514.1              |
| Actinobacteria SURF 21.2     | RJP34515.1              |
| Anaerotruncus colihominis    | WP_117546765.1          |
| Aquibacillus sp. TKL69       | WP_143891742.1          |
| Aquifex aeolicus             | WP_010880626.1          |
| Bacillaceae.1                | WP_002011701.1          |
| Bacillaceae.2                | WP_112181886.1          |
| Bacillaceae.3                | WP_011232273.1          |
| Bacillaceae.4                | WP_062321281.1          |
| Bacillaceae neizhouensis     | WP_110935369.1          |
| Bacilli.1                    | WP_003227815.1          |
| Bacilli.2                    | WP_003229318.1          |
| Bacillus.3                   | WP_000861818.1          |
| Bacillus agaradhaerens       | WP_078576593.1          |
| Bacillus bogoriensis         | WP_026672943.1          |
| Bacillus circulans           | TRZ39878.1              |
| Bacillus halodurans          | WP_010899349.1          |
| Bacillus halosaccharovorans  | WP_078431422.1          |
| Bacillus kyonggiensis        | WP_136831967.1          |
| Bacillus marisflavi          | WP_121618573.1          |
| Bacillus massilioanorexius   | WP_019240582.1          |
| Bacillus nealsonii           | WP_016200772.1          |
| Bacillus salaries            | WP_125560471.1          |
| Bacillus sp. AFS040349       | WP_098799700.1          |
| Bacillus sp. FJAT.45385      | WP_088104464.1          |
| Bacillus sp. FJAT.45505      | WP_100359422.1          |
| Bacillus sp. J37             | WP_026559147.1          |
| Bacillus sp. M5HDSG1.1       | WP_127739148.1          |
| Bacillus sp. OK048           | WP_090761906.1          |
| Bacillus sp. OK085           | WP_132096419.1          |
| Bacillus sp. SJS             | WP_035413352.1          |
| Bacillus sporothermodurans.1 | WP_066232796.1          |
| Bacillus sporothermodurans.2 | WP_107920736.1          |
| Bacillus subtilis.1          | 5J21_A                  |
| Bacillus subtilis.2          | BAM52305.1              |
| Bacteroidia.1                | WP_005842464.1          |



|                                       |                |
|---------------------------------------|----------------|
| Bhargavaea cecembensis                | WP_063182092.1 |
| Bifidobacterium adolescentis          | WP_011743495.1 |
| Brevibacillus brevis                  | WP_012683809.1 |
| Burkholderia cepacia complex.1        | WP_059558875.1 |
| <b>Burkholderia cepacia complex.2</b> | WP_059908919.1 |
| Burkholderia cepacia complex.3        | WP_060365175.1 |
| Burkholderia cepacia complex.4        | WP_124519125.1 |
| Burkholderia cepacia complex.5        | WP_124596460.1 |
| Burkholderia cepacia complex.6        | WP_124887051.1 |
| Burkholderia pseudomallei.1           | WP_010109219.1 |
| Burkholderia pseudomallei.2           | WP_010119098.1 |
| Burkholderia pseudomallei.3           | WP_059472090.1 |
| Burkholderia pseudomallei.4           | WP_059598516.1 |
| Burkholderia pseudomallei.5           | WP_066491349.1 |
| Burkholderia pseudomallei.6           | WP_066572434.1 |
| Burkholderiaceae.1                    | WP_124512156.1 |
| Candidatus Rokubacteria AR18          | PYO01206.1     |
| Candidatus Rokubacteria AR23          | PYN73540.1     |
| Candidatus Rokubacteria AR33          | PYN14251.1     |
| Candidatus Rokubacteria AR36          | PYM86219.1     |
| Candidatus Rokubacteria AR44          | PYM33524.1     |
| Carnobacterium inhibens.1             | AGY82610.1     |
| Carnobacterium inhibens.2             | WP_081701929.1 |
| Carnobacterium inhibens.3             | WP_081901371.1 |
| Carnobacterium sp. WN1374             | WP_081896451.1 |
| Carnobacterium viridans.1             | SDQ29467.1     |
| Carnobacterium viridans.2             | WP_089977088.1 |
| Chromobacterium violaceum             | 2YB1_A         |
| Clostridiaceae.1                      | WP_042393906.1 |
| Clostridiaceae.2                      | WP_043853810.1 |
| Clostridiaceae.3                      | WP_070779580.1 |
| Clostridiales.1                       | WP_089706110.1 |
| Clostridiales.2                       | WP_110441477.1 |
| Clostridiales CIM.MAG 272             | PWM22748.1     |
| Clostridium bornimense                | WP_044039469.1 |
| Clostridium botulinum                 | WP_035782989.1 |
| Clostridium butyricum.1               | EDT74077.1     |
| Clostridium butyricum.2               | ETI87721.1     |
| Clostridium butyricum.3               | GEQ20569.1     |
| Clostridium butyricum.4               | WP_002581741.1 |

|                                     |                |
|-------------------------------------|----------------|
| Clostridium butyricum.5             | WP_003430874.1 |
| Clostridium butyricum.6             | WP_027634878.1 |
| Clostridium butyricum.7             | WP_035763983.1 |
| Clostridium butyricum.8             | WP_124230146.1 |
| Clostridium celatum                 | WP_005215243.1 |
| Clostridium cuniculi                | WP_133016623.1 |
| Clostridium sp. BSD2780061688st1 H5 | WP_138302937.1 |
| Clostridium sp. CAG.221             | CDB15711.1     |
| Clostridium sp. CAG.265             | CDB74890.1     |
| Clostridium sp. IBUN125C            | KJZ84038.1     |
| Clostridium sp. Marseille.P299      | WP_066717357.1 |
| Clostridium sulfidigenes            | WP_035131859.1 |
| Clostridium taeniosporum            | WP_069679751.1 |
| Collinsella environmental samples   | CDD41077.1     |
| Collinsella ihuae                   | WP_066831160.1 |
| Collinsella sp. An271               | WP_087200767.1 |
| Collinsella sp. An7                 | WP_087355930.1 |
| Desulfococcus palustris             | WP_104372931.1 |
| Domibacillus indicus                | WP_046175969.1 |
| Drancourtella sp. An12              | WP_087167055.1 |
| Drancourtella sp. An177             | WP_087210278.1 |
| Drancourtella sp. An210             | WP_087202035.1 |
| Drancourtella sp. An57              | WP_087253610.1 |
| Enorma massiliensis.1               | WP_019127859.1 |
| Enorma massiliensis.2               | WP_087186749.1 |
| Enterococcus aquimarinus            | WP_071874080.1 |
| Epulopiscium sp. Nele67.Bin004      | OON99087.1     |
| Epulopiscium sp. Nele67.Bin005      | OON96071.1     |
| Epulopiscium sp. Nuni2H MBin001     | OOB79275.1     |
| Escherichia coli.1                  | AKK12342.2     |
| Escherichia coli.2                  | WP_103809405.1 |
| Eubacteriaceae                      | WP_090127354.1 |
| Eubacterium sp. An11                | WP_140401491.1 |
| Eubacterium sp. An3                 | WP_087281340.1 |
| Eubacterium sp. ER2                 | WP_033127123.1 |
| Faecalibacterium sp. An121          | WP_087229524.1 |
| Faecalibacterium sp. An192          | WP_087365006.1 |
| Faecalibacterium sp. An58           | WP_087324950.1 |
| Firmicute.1                         | CDD27577.1     |
| Flavonifractor sp.                  | SCI97575.1     |

|                                  |                |
|----------------------------------|----------------|
| Flavonifractor sp. An135         | WP_087380394.1 |
| Flavonifractor sp. An9           | WP_087399922.1 |
| Flavonifractor sp. An92          | WP_087262443.1 |
| Flavonifractor sp. An82          | WP_087337310.1 |
| Fontibacillus panacisegetis      | WP_091234269.1 |
| Fontibacillus phaseoli           | WP_114497580.1 |
| Gemmiger sp. An120               | WP_087172009.1 |
| Gemmiger sp. An50                | WP_087181920.1 |
| Gemmiger sp. An87                | WP_087184910.1 |
| Geobacillus thermoleovorans      | BAD75543.1     |
| Gracilibacillus dipsosauri       | WP_109983033.1 |
| Gracilibacillus kekensis         | WP_073199043.1 |
| Gracilibacillus lacisalsi        | WP_018930332.1 |
| Gracilibacillus massiliensis     | WP_058308351.1 |
| Gracilibacillus orientalis       | WP_091480667.1 |
| Gracilibacillus ureilyticus      | WP_089743859.1 |
| Gracilibacter sp. BRH c7a        | KUO58778.1     |
| Jeotgalibaca sp. H21T32          | WP_126108452.1 |
| Lachnospiraceae.1                | WP_087269411.1 |
| Lachnospiraceae.2                | WP_117468856.1 |
| Lachnospiraceae phocaense        | WP_076779481.1 |
| Lachnospiraceae sp. An118        | WP_087175325.1 |
| Lachnospiraceae sp. An131        | WP_087165922.1 |
| Lachnospiraceae sp. An138        | WP_087306802.1 |
| Lachnospiraceae sp. An169        | WP_087159982.1 |
| Lachnospiraceae sp. An298        | WP_087151577.1 |
| Lachnotalea glycerini            | WP_094375661.1 |
| Lactococcus lactis               | WP_003131121.1 |
| Legionella sp. BC.3.72.1         | PJD91620.1     |
| Legionella sp. BC.3.72.2         | PJD91621.1     |
| Lysinibacillus sinduriensis      | WP_036200076.1 |
| Macrococcus caseolyticus         | WP_012656252.1 |
| massiliensis massiliensis        | WP_054251776.1 |
| Moorella thermoacetica           | WP_082297226.1 |
| Moorella thermoacetica DSM 21394 | OIQ55514.1     |
| Moraxellaceae                    | WP_001160984.1 |
| Mycobacterium tuberculosis       | AMC68307.1     |
| Mycoplasma pneumoniae            | WP_010874497.1 |
| Niameybacter massiliensis        | WP_053982924.1 |
| Oceanobacillus arenosus          | WP_115774139.1 |

|                                       |                |
|---------------------------------------|----------------|
| Oceanobacillus rekensis               | WP_087974702.1 |
| Oceanobacillus sp. YLB.02             | WP_121523375.1 |
| Oxobacter pfennigii                   | WP_054877098.1 |
| Paenibacillaceae.1                    | WP_105444306.1 |
| Paenibacillaceae.2                    | WP_042234140.1 |
| Paenibacillus borealis                | WP_076110148.1 |
| Paenibacillus bouchesdurhonensis      | WP_110930267.1 |
| Paenibacillus bovis                   | WP_060532868.1 |
| Paenibacillus catalpae                | WP_091188553.1 |
| Paenibacillus cellulosityticus        | WP_110045449.1 |
| Paenibacillus chibensis               | WP_127605437.1 |
| Paenibacillus crassostreae            | WP_068660689.1 |
| Paenibacillus dauci                   | WP_046228258.1 |
| Paenibacillus fonticola               | WP_019635325.1 |
| Paenibacillus glycanilyticus          | WP_127497391.1 |
| Paenibacillus ihumii                  | WP_055106647.1 |
| Paenibacillus lentus                  | WP_125081105.1 |
| Paenibacillus odorifer                | WP_076119532.1 |
| Paenibacillus pectinilyticus          | WP_065850928.1 |
| Paenibacillus physcomitrellae         | WP_094094874.1 |
| Paenibacillus rhizosphaerae           | WP_076173828.1 |
| Paenibacillus senegalimassiliensis    | WP_059050569.1 |
| Paenibacillus sp. 453mf               | WP_091156300.1 |
| Paenibacillus sp. A9                  | WP_017811744.1 |
| Paenibacillus sp. BK033               | WP_132312841.1 |
| Paenibacillus sp. FSL H7.0326         | WP_076315224.1 |
| Paenibacillus sp. FSL H7.0357         | WP_038593686.1 |
| Paenibacillus sp. JDR.2               | WP_012772289.1 |
| Paenibacillus sp. SMB1                | WP_111144931.1 |
| Paenibacillus sp. SSG.1               | WP_089548747.1 |
| Paenibacillus sp. TCA20               | GAK40618.1     |
| Paenibacillus sp. UNC496MF            | WP_090639842.1 |
| Paenibacillus sp. XY044               | WP_094597195.1 |
| Paenibacillus stellifer               | WP_038694973.1 |
| Paenibacillus wulumuqiensis           | WP_046216001.1 |
| Paenisporosarcina quisquiliarum       | WP_090566887.1 |
| Paraliobacillus ryukyuensis.1         | WP_079711015.1 |
| Paraliobacillus ryukyuensis.2         | WP_113867764.1 |
| Paraliobacillus ryukyuensis DSM 15140 | RBP00764.1     |
| Paraliobacillus sediminis             | WP_117168781.1 |

|                                               |                |
|-----------------------------------------------|----------------|
| Pectobacterium aquaticum                      | WP_116155214.1 |
| Pectobacterium carotovorum                    | WP_052237778.1 |
| Photorhabdus temperata                        | WP_051769179.1 |
| Phycisphaerales DLM2.Bin74                    | TVQ60296.1     |
| Planctomycetes                                | RMH28972.1     |
| Pontibacillus yanchengensis                   | WP_084102975.1 |
| Pseudoflavonifractor capillosus               | WP_006574578.1 |
| Pseudoflavonifractor sp. An85                 | WP_087258172.1 |
| Pseudoflavonifractor sp. BSD2780061688st1 E11 | WP_138373423.1 |
| Pseudomonas aeruginosa                        | PTC38341.1     |
| Pseudomonas putida                            | WP_136914820.1 |
| <b>Pseudomonas sp. p106</b>                   | WP_125924462.1 |
| <b>Pseudomonas syringae</b>                   | AFM38988.1     |
| Psychrobacillus psychrodurans                 | WP_093494959.1 |
| Ruminococcaceae                               | WP_087247369.1 |
| Ruminococcus sp. OM05.10BH                    | WP_118636107.1 |
| Saccharibacillus sacchari                     | WP_037286588.1 |
| sediment metagenome                           | OFW57282.1     |
| soil metagenome                               | OLD51090.1     |
| Staphylococcus aureus                         | P63982.1       |
| Streptococcus mutans.1                        | WP_002263062.1 |
| Streptococcus mutans.2                        | WP_002263149.1 |
| Streptococcus pneumoniae                      | WP_000565352.1 |
| Streptococcus pyogenes                        | WP_011285191.1 |
| Streptohalobacillus salinus                   | WP_110251699.1 |
| <b>subsurface metagenome</b>                  | OGT51126.1     |
| Thaumarchaeota TA 15                          | TLX87356.1     |
| Thaumarchaeota TA 22                          | TLX85415.1     |
| Thermoprotei B53 G1                           | RLE67673.1     |
| Thermotoga maritima                           | WP_004081319.1 |
| Thermus aquaticus                             | Q9XDH5.1       |
| Thermus thermophilus.1                        | WP_011227759.1 |
| Thermus thermophilus.2                        | WP_011227864.1 |
| unclassified Ruminococcaceae                  | WP_008982155.1 |
| Virgibacillus sp. LJ137                       | WP_123317284.1 |
| Xenorhabdus bovienii                          | WP_046336670.1 |

**Table S3.** Oligonucleotides used in this study

| Name         | 5' Sequence 3'                                          |
|--------------|---------------------------------------------------------|
| PsfA F       | CCATCATCACACAGCCAGGATCCGAATTC AATGTCATCAATAACGCA<br>TGC |
| PsfA R       | TCGACTTAAGCATTATGCGGCCGCAAGCTTTACCGTGCATACAAACGC        |
| PsfB-RSF F   | GTTAAGTATAAGAAGGAGATATACATATGGAAGGCGTCATGAATATTC        |
| PsfB-RSF R   | AGCGGTGGCAGCAGCCTAGGTTAATTAATCATTTCAGCGTCGCATG          |
| PsfCM2 F     | CTGGTGCCGCGCGGCAGCATGAACAGGAAAGTCGTG                    |
| PsfCM2 R     | CTTTGTTAGCAGCCGGATCCTTAGCCCATCAGTGATTG                  |
| PsfC H22A F  | GACACGGCGGTTCACTTGTTGTTGAGCAAAAAACAG                    |
| PsfC H22A R  | GTGAACCGCCGTGTCCACGACTTTCCTGTTCATAATG                   |
| PsfC H24A F  | CATGTTGCCTTGTTGTTGAGCAAAAAACAGCGCG                      |
| PsfC H24A R  | CAACAAGGCAACATGCGTGTCCACGACTTTCCTG                      |
| PsfC S28A F  | GCGCTGTTTTTTGGCCAACAACAAGTGAACATGCGTGTCC                |
| PsfC S28A R  | TGTTGTTGGCCAAAAAACAGCGCGTGCCCGATTGGGCGGC                |
| PsfC K29A F  | ATGTTCACTTGTTGTTGAGCGCAAAACAGCGCG                       |
| PsfC K29A R  | GCCCAATCGGGCACGCGCTGTTTTGCGCTCAACAAC                    |
| PsfC K30A F  | ATGTTCACTTGTTGTTGAGCAAAGCACAGCGCG                       |
| PsfC K30A R  | GCCCAATCGGGCACGCGCTGTGCTTTGCTCAACAAC                    |
| PsfC Q31A F  | AAAAAAGCGCGCGTGCCCGATTGGGCGGCGATC                       |
| PsfC Q31A R  | CACGCGCGCTTTTTTGTCTCAACAACAAGTGAAC                      |
| PsfC D35A F  | CGCGTGCCCGCTTGGGCGGCGATCAAGCGGATGCTCGATGTG              |
| PsfC D35A R  | CGCCGCCAAGCGGGCACGCGCTGTTTTTTGTCTCAACAACAAG             |
| PsfC E58A F  | ACCGCGCACATCGAGGCCGATGGCTATCAAACCTTG                    |
| PsfC E58A R  | CTCGATGTGCGCGGTAACGCATAGCGCATCCAGTTCATC                 |
| PsfC H59A F  | ACCGAGGCGATCGAGGCCGATGGCTATCAAACCTTG                    |
| PsfC H59A R  | CTCGATCGCCTCGGTAACGCATAGCGCATCCAGTTCATC                 |
| PsfC Q91A F  | ACTTACGCGGGTGTCCGCAATTTTTCCGGGAGCGGAGCTTG               |
| PsfC Q91A R  | GACACCCGCGTAAGTGAGCCGCCAGCGTGCTG                        |
| PsfC E100A F | TTCCGGGAGCGGCGCTTGAGTTGGCCAACAGGACCAACG                 |
| PsfC E100A R | CTCAAGCGCCGCTCCCGGAAAAATGGCGACACCCTGGTAA                |
| PsfC H149A F | GTGGCTGCTCACATTTTCTGGCCGGGCAAGACCTG                     |
| PsfC H149A R | AATGTGAGCAGCCACCAGCTTGAAAGGCCTGC                        |
| PsfC H150A F | GCTCATGCCATTTTCTGGCCGGGCAAGACCTGTGAC                    |
| PsfC H150A R | GAAAATGCATGAGCCACCAGCTTGAAAGGCCTGC                      |
| PsfC E172A F | GCCATCGCGGTGCCGGCGAAGGACCTGGCAAATG                      |
| PsfC E172A R | CGGCACCGCGATGGCGTTCACATAGCGACCCAG                       |
| PsfC K176A F | CCGGCGGCGGACCTGGCAAATGCGCAGAATTATGTTG                   |
| PsfC K176A R | CAGGTCCGCGCCGGCAGCTTCGATGGCGTTCACATAGCGACCCAG           |
| PsfC D200A F | GGCTCCGCGGCGCATACTTCATTACAGGTGGGGGCCTGC                 |
| PsfC D200A R | ATGCGCCGCGGAGCCACCCGTGGTGTCAAG                          |
| PsfC H202A F | GATGCGGCGACCTTCATTACAGGTGGGGGCCTGCCGTAC                 |
| PsfC H202A R | GAAGGTCGCCGCATCGGAGCCACCCGTGGTGTCAAG                    |
| PsfF F       | CTGGTGCCGCGCGGCAGCCATATGAAACCGGCCTGCTATG                |
| PsfF R       | CTTTGTTAGCAGCCGGATCCTCGAGTCACTCGCTCAAGAACAC             |
| Psf8 F       | CTGGTGCCGCGCGGCAGCCATATGCTAATTACGCTTGCCGGTATCGATG<br>GG |
| Psf8 R       | CTTTGTTAGCAGCCGGATCCTCGAGTCATGGGCGCCCTGCAGCA            |
| Psf10 F      | CTGGTGCCGCGCGGCAGCCATATGGCCAACCCTGAAAGC                 |

|                     |                                                             |
|---------------------|-------------------------------------------------------------|
| Psf10 R             | TCGGGCTTTGTTAGCAGCCGGATCCTTAGACATGTTTCAGGCTCAATC            |
| Psf12 F             | GCCGCGCGGCAGCCATATGATGAGTTGCAAGCGGCTG                       |
| Psf12 R             | GCTTTGTTAGCAGCCGGATCCTCATAATGACCCCATCACTGATG                |
| PsfD Duet F         | TAAGAAGGAGATATACATATATGAACCGCGTGGTGGGG                      |
| PsfD Duet R         | TTTCTTTACCAGACTCGAGGTCATGACGCCTTCCATGCTTTG                  |
| PsfE F              | AGCTCGGCGCGCCTGCAGGTCGACAAGCTTATGGACGTTTCGCACTTTA<br>G      |
| PsfE R              | TTTCTGTTGCGACTTAAGCATTATGCGGGCCGCTCAACCATAATTGATGGC<br>AATG |
| Psf5 F              | GTTAAGTATAAGAAGGAGATATACATATGCCAGACACTTTGATC                |
| Psf5 R              | CGCAGCAGCGGTTTCTTTACCAGACTCGAGTCAAGCGTAATCGACTGC            |
| <i>Ps106</i> PsfC F | CTGGTGCCGCGCGGCAGCATGAAGCGCACTATTCTTGATGC                   |
| <i>Ps106</i> PsfC R | CTTTGTTAGCAGCCGGATCCTCGAGTTAAGGCTCGCGACGCTC                 |
| <i>Gb</i> PsfC F    | CTGGTGCCGCGCGGCAGCATGAAGATCGACACTCATAAC                     |
| <i>Gb</i> PsfC R    | CTTTGTTAGCAGCCGGATCCTTACGCCAAAAATTCCATAAC                   |
| <i>Bs</i> PsfC F    | CTGGTGCCGCGCGGCAGCATGAAACTGGATACGCATGTACAC                  |
| <i>Bs</i> PsfC R    | CTTTGTTAGCAGCCGGATCCTTAGGCAGCGGCCTGTTTC                     |

**Table S4.** Plasmids and microorganisms used in this study.

| Strain or plasmid                                                           | Relevant characteristics                                                                                                                                          | Source or reference                     |
|-----------------------------------------------------------------------------|-------------------------------------------------------------------------------------------------------------------------------------------------------------------|-----------------------------------------|
| <i>Escherichia coli</i> NEB5 $\alpha$<br>(plasmid maintenance)              | fhuA2 $\Delta$ (argF-lacZ)U169 phoA glnV44 $\Phi$ 80<br>$\Delta$ (lacZ)M15 gyrA96 recA1 relA1 endA1 thi-<br>1 hsdR17                                              | New England<br>BioLabs (Ipswich,<br>MA) |
| <i>Escherichia coli</i> BL21(DE3)<br>(protein overexpression)               | huA2 [lon] ompT gal ( $\lambda$ DE3) [dcm] $\Delta$ hsdS<br>$\lambda$ DE3 = $\lambda$ sBamHIo $\Delta$ EcoRI-B<br>int::(lacI::PlacUV5::T7 gene1) i21 $\Delta$ in5 | New England<br>BioLabs (Ipswich,<br>MA) |
| <i>Escherichia coli</i> Rosetta<br>2(DE3) pLysS<br>(protein overexpression) | F <sup>-</sup> <i>ompT hsdS<sub>B</sub></i> (r <sub>B</sub> <sup>-</sup> m <sub>B</sub> <sup>-</sup> ) <i>gal dcm</i> (DE3)<br>pLysSRARE2 (Cam <sup>R</sup> )     | EMDMillipore<br>(Darmstadt,<br>Germany) |
| <i>Pseudomonas syringae</i> PB-<br>5123                                     | Fosfomycin-producing strain used in<br>amplification of <i>psf</i> genes                                                                                          | Shionogi Co. Ltd.                       |
| pRSFDuet                                                                    | Kan <sup>R</sup> empty expression plasmid                                                                                                                         | Novagen                                 |
| pACYCDuet                                                                   | Cm <sup>R</sup> empty expression plasmid                                                                                                                          | Novagen                                 |
| pETDuet                                                                     | Amp <sup>R</sup> empty expression plasmid                                                                                                                         | Novagen                                 |
| pET15b                                                                      | Amp <sup>R</sup> empty expression plasmid                                                                                                                         | Novagen                                 |
| pET15b_psfC                                                                 | Amp <sup>R</sup> expression of PsfC                                                                                                                               | This study                              |
| pET15b_psfCM2                                                               | Amp <sup>R</sup> expression of PsfC-M2 (N-terminal<br>truncant starting at Met14)                                                                                 | This study                              |
| pET15b_psfB                                                                 | Amp <sup>R</sup> expression of PsfB                                                                                                                               | This study                              |
| pRSFDuet_his-psfA                                                           | Kan <sup>R</sup> expression of PsfA                                                                                                                               | This study                              |
| pRSFDuet_his-psfA_psfB                                                      | Kan <sup>R</sup> co-expression of PsfA, PsfB                                                                                                                      | This study                              |
| pET28b_RhiH                                                                 | Kan <sup>R</sup> expression of RhiH                                                                                                                               | Borisova et al. Chem<br>Biol 2010       |
| pETDuet_His-PsfC                                                            | Amp <sup>R</sup> co-expressions of psfC                                                                                                                           | This study                              |
| pETDuet_His-PsfC_psfD                                                       | Amp <sup>R</sup> co-expressions of psfC and psfD                                                                                                                  | This study                              |
| pET15b_psfF                                                                 | Amp <sup>R</sup> co-expressions of psfF                                                                                                                           | This study                              |
| pET15b_psf8                                                                 | Amp <sup>R</sup> co-expressions of psf8                                                                                                                           | This study                              |
| pET15b_psf10                                                                | Amp <sup>R</sup> co-expressions of psf10                                                                                                                          | This study                              |
| pET15b_psf12                                                                | Amp <sup>R</sup> co-expressions of psf12                                                                                                                          | This study                              |

|                   |                                                                                             |            |
|-------------------|---------------------------------------------------------------------------------------------|------------|
| pACYC_psfE_psf5   | Cm <sup>R</sup> co-expressions of psfE and psf5                                             | This study |
| pET15b_psfC-H22A  | Amp <sup>R</sup> (co-)expressions of psfC-m2 H22A mutant                                    | This study |
| pET15b_psfC-H24A  | Amp <sup>R</sup> (co-)expressions of psfC-m2 H24A mutant                                    | This study |
| pET15b_psfC-S28A  | Amp <sup>R</sup> (co-)expressions of psfC-m2 S28A mutant                                    | This study |
| pET15b_psfC-K29A  | Amp <sup>R</sup> (co-)expressions of psfC-m2 K29A mutant                                    | This study |
| pET15b_psfC-K30A  | Amp <sup>R</sup> (co-)expressions of psfC-m2 K30A mutant                                    | This study |
| pET15b_psfC-Q31A  | Amp <sup>R</sup> (co-)expressions of psfC-m2 Q31A mutant                                    | This study |
| pET15b_psfC-D35A  | Amp <sup>R</sup> (co-)expressions of psfC-m2 D35A mutant                                    | This study |
| pET15b_psfC-E58A  | Amp <sup>R</sup> (co-)expressions of psfC-m2 E58A mutant                                    | This study |
| pET15b_psfC-H59A  | Amp <sup>R</sup> (co-)expressions of psfC-m2 H59A mutant                                    | This study |
| pET15b_psfC-Q91A  | Amp <sup>R</sup> (co-)expressions of psfC-m2 Q91A mutant                                    | This study |
| pET15b_psfC-E100A | Amp <sup>R</sup> (co-)expressions of psfC-m2 E100A mutant                                   | This study |
| pET15b_psfC-H149A | Amp <sup>R</sup> (co-)expressions of psfC-m2 H149A mutant                                   | This study |
| pET15b_psfC-H150A | Amp <sup>R</sup> (co-)expressions of psfC-m2 H150A mutant                                   | This study |
| pET15b_psfC-E172A | Amp <sup>R</sup> (co-)expressions of psfC-m2 E172A mutant                                   | This study |
| pET15b_psfC-K176A | Amp <sup>R</sup> (co-)expressions of psfC-m2 K176A mutant                                   | This study |
| pET15b_psfC-D200A | Amp <sup>R</sup> (co-)expressions of psfC-m2 D200A mutant                                   | This study |
| pET15b_psfC-H202A | Amp <sup>R</sup> (co-)expressions of psfC-m2 H202A mutant                                   | This study |
| pET15b_PsI06PsfC  | Amp <sup>R</sup> (co-)expressions of PsfC homolog from <i>Pseudomonas</i> sp. p106          | This study |
| pET15b_GbPsfC     | Amp <sup>R</sup> (co-)expressions of PsfC homolog from <i>Gammaproteobacterium bacteria</i> | This study |
| pET15b_BsPsfC     | Amp <sup>R</sup> (co-)expressions of PsfC homolog from <i>Burkholderia stagnalis</i>        | This study |



**Table S5.** Data Collection and Refinement Statistics

|                                   | Native (diiron form)      | Derivative (Pb)           | Anomalous               |
|-----------------------------------|---------------------------|---------------------------|-------------------------|
| <b>Data collection</b>            |                           |                           |                         |
| Wavelength (Å)                    | 1.127                     | 0.9464                    | 1.739                   |
| Resolution (Å)                    | 1.963                     | 1.59                      | 3.1                     |
| Resolution range (Å) <sup>1</sup> | 65.5 - 1.96 (1.97 - 1.96) | 73.9 - 1.59 (1.62 - 1.59) | 66.1 - 3.1 (3.16 - 3.1) |
| Space group                       | I 41                      | I 41                      | I 41                    |
| Unit cell                         | 106.8 106.8 83.0          | 104.4 104.4 83.5          | 107.7 107.7 83.5        |
| Total reflections                 | 238,132                   | 828,529                   | 111,620                 |
| Unique reflections                | 30,430                    | 59,568                    | 8,732                   |
| Multiplicity                      | 7.8 (6.0)                 | 13.9 (12.2)               | 12.8 (14.1)             |
| Completeness (%)                  | 91.2 (68.9)               | 100 (99.9)                | 99.5 (100)              |
| Mean I/sigma (I)                  | 15.6 (2.3)                | 24.1 (2.5)                | 16.6 (2.3)              |
| R-merge <sup>2</sup> (%)          | 9.0 (91.9)                | 6.2 (82.1)                | 12.8 (111)              |
| R-meas (%)                        | 9.6 (100)                 | 6.4 (85.8)                | 13.3 (115)              |
| CC ½                              | 0.997 (0.752)             | 0.999 (0.809)             | 0.999 (0.658)           |
| <b>Refinement</b>                 |                           |                           |                         |
| Resolution (Å)                    | 25.0-1.96                 |                           |                         |
| No. reflections                   | 28,900                    |                           |                         |
| R-work                            | 22.6                      |                           |                         |
| R-free <sup>3</sup>               | 26.3                      |                           |                         |
| Number of atoms                   |                           |                           |                         |
| Protein                           | 3791                      |                           |                         |
| Metals                            | 4                         |                           |                         |
| Water                             | 119                       |                           |                         |
| Average B-factor                  |                           |                           |                         |
| Macromolecules                    | 43.4                      |                           |                         |
| Metals                            | 36.5                      |                           |                         |
| Solvent                           | 43.3                      |                           |                         |
| RMS (angles)                      | 1.3                       |                           |                         |
| Favored (%)                       | 95                        |                           |                         |
| Allowed (%)                       | 3.2                       |                           |                         |
| Outliers (%)                      | 1.6                       |                           |                         |
| Rotamer outliers (%)              | 1.9                       |                           |                         |
| Clashscore                        | 8.92                      |                           |                         |

1. Highest resolution shell is shown in parenthesis.

2.  $R_{\text{merge}} = \frac{\sum (|I_i - \langle I_i \rangle|)}{\sum I_i}$  where  $I_i$  = intensity of the  $i$ th reflection and  $\langle I_i \rangle$  = mean intensity.

3.  $R\text{-factor} = \frac{\sum (|F_{\text{obs}}| - k|F_{\text{calc}}|)}{\sum |F_{\text{obs}}|}$  and R-free is the R value for a test set of reflections consisting of a random 5% of the diffraction data not used in refinement.

## REFERENCES

1. Borisova SA, Circello BT, Zhang JK, van der Donk WA, & Metcalf WW (2010) Biosynthesis of rhizotocins, antifungal phosphonate oligopeptides produced by *Bacillus subtilis* ATCC6633. *Chem. Biol.* 17(1):28-37.
2. Peter DM, Vogeli B, Cortina NS, & Erb TJ (2016) A Chemo-Enzymatic Road Map to the Synthesis of CoA Esters. *Molecules* 21(4):517.
3. Vonrhein C, *et al.* (2011) Data processing and analysis with the autoPROC toolbox. *Acta Crystallogr. D* 67(Pt 4):293-302.
4. McCoy AJ, *et al.* (2007) Phaser crystallographic software. *J. Appl. Crystallogr.* 40(4):658-674.
5. Potterton L, *et al.* (2018) CCP4i2: the new graphical user interface to the CCP4 program suite. *Acta Crystallogr. D* 74(Pt 2):68-84.
6. Langer G, Cohen SX, Lamzin VS, & Perrakis A (2008) Automated macromolecular model building for X-ray crystallography using ARP/wARP version 7. *Nat. Protoc.* 3(7):1171-1179.
7. Murshudov GN, *et al.* (2011) REFMAC5 for the refinement of macromolecular crystal structures. *Acta Crystallogr. D* 67(Pt 4):355-367.
8. Emsley P, Lohkamp B, Scott WG, & Cowtan K (2010) Features and development of Coot. *Acta Crystallogr. D* 66(Pt 4):486-501.
9. Katoh K & Standley DM (2013) MAFFT multiple sequence alignment software version 7: Improvements in performance and usability. *Mol. Biol. Evol* 30(4):772-780.
10. Price MN, Dehal PS, & Arkin AP (2010) FastTree 2 – Approximately Maximum-Likelihood Trees for Large Alignments. *PLOS ONE* 5(3):e9490.
11. Tietz JI, *et al.* (2017) A new genome-mining tool redefines the lasso peptide biosynthetic landscape. *Nat. Chem. Biol.* 13(5):470-478.
12. Kim SY, *et al.* (2012) Different biosynthetic pathways to fosfomycin in *Pseudomonas syringae* and *Streptomyces* species. *Antimicrob. Agents Chemother.* 56(8):4175-4183.
13. Garcia P, Arca P, & Evaristo Suarez J (1995) Product of *fosC*, a gene from *Pseudomonas syringae*, mediates fosfomycin resistance by using ATP as cosubstrate. *Antimicrob. Agents Chemother.* 39(7):1569-1573.
14. Kobayashi S, Kuzuyama T, & Seto H (2000) Characterization of the fomA and fomB gene products from *Streptomyces wedmorensis*, which confer fosfomycin resistance on *Escherichia coli*. *Antimicrob. Agents Chemother.* 44(3):647-650.
15. Kuzuyama T, Kobayashi S, O'Hara K, Hidaka T, & Seto H (1996) Fosfomycin monophosphate and fosfomycin diphosphate, two inactivated fosfomycin derivatives formed by gene products of fomA and fomB from a fosfomycin producing organism *Streptomyces wedmorensis*. *J. Antibiot.* 49(5):502-504.
16. McBride MJ, *et al.* (2021) Structure and assembly of the diiron cofactor in the heme-oxygenase-like domain of the N-nitrosourea-producing enzyme SznF. *Proc. Natl. Acad. Sci. U. S. A.* 118(4).
